# Supplementary material
Source: Elsevier journal article supplement (http://library.osu.edu/projects/msa/suppmat/v257.i2.pp164-169/mmc2.pdf)
Supplement: mmc2 [file mmc2.pdf]

**Table 2:** Assigned infrared transitions for the  $\nu_8$  band of  $\beta$ -propiolactone.

| $J'_{Ka'Kc'}$ |    |    | $\leftarrow$ | $J''_{Ka''Kc''}$ |    |    | $\nu_{\text{obs}}$ | $\nu_{\text{obs}} - \nu_{\text{calc}}$ |
|---------------|----|----|--------------|------------------|----|----|--------------------|----------------------------------------|
| 28            | 18 | 10 | $\leftarrow$ | 29               | 19 | 11 | 1077.45629         | -0.00037                               |
| 23            | 21 | 2  | $\leftarrow$ | 24               | 22 | 3  | 1077.80163         | 0.00036                                |
| 34            | 12 | 22 | $\leftarrow$ | 35               | 13 | 23 | 1078.31830         | -0.00008                               |
| 32            | 12 | 20 | $\leftarrow$ | 33               | 13 | 21 | 1078.92587         | 0.00001                                |
| 30            | 13 | 17 | $\leftarrow$ | 31               | 14 | 18 | 1079.06373         | 0.00001                                |
| 20            | 20 | 0  | $\leftarrow$ | 21               | 21 | 1  | 1079.18181         | 0.00008                                |
| 23            | 17 | 6  | $\leftarrow$ | 24               | 18 | 7  | 1079.50500         | 0.00006                                |
| 33            | 10 | 23 | $\leftarrow$ | 34               | 11 | 24 | 1079.98189         | 0.00023                                |
| 27            | 13 | 14 | $\leftarrow$ | 28               | 14 | 15 | 1080.01846         | 0.00018                                |
| 39            | 10 | 29 | $\leftarrow$ | 40               | 11 | 30 | 1080.11185         | 0.00059                                |
| 26            | 13 | 13 | $\leftarrow$ | 27               | 14 | 14 | 1080.33732         | -0.00003                               |
| 48            | 8  | 40 | $\leftarrow$ | 49               | 9  | 41 | 1080.34552         | -0.00027                               |
| 47            | 8  | 39 | $\leftarrow$ | 48               | 9  | 40 | 1080.62024         | -0.00020                               |
| 22            | 15 | 7  | $\leftarrow$ | 23               | 16 | 8  | 1080.70902         | -0.00005                               |
| 45            | 10 | 36 | $\leftarrow$ | 46               | 9  | 37 | 1080.94727         | -0.00010                               |
| 21            | 14 | 7  | $\leftarrow$ | 22               | 15 | 8  | 1081.47847         | -0.00015                               |
| 42            | 9  | 33 | $\leftarrow$ | 43               | 10 | 34 | 1081.50676         | 0.00039                                |
| 45            | 7  | 39 | $\leftarrow$ | 46               | 6  | 40 | 1081.63683         | -0.00028                               |
| 45            | 6  | 39 | $\leftarrow$ | 46               | 7  | 40 | 1081.63683         | -0.00023                               |
| 44            | 7  | 38 | $\leftarrow$ | 45               | 6  | 39 | 1081.91448         | -0.00031                               |
| 44            | 6  | 38 | $\leftarrow$ | 45               | 7  | 39 | 1081.91448         | -0.00021                               |
| 42            | 8  | 34 | $\leftarrow$ | 43               | 9  | 35 | 1081.95598         | -0.00015                               |
| 43            | 8  | 36 | $\leftarrow$ | 44               | 7  | 37 | 1081.96179         | 0.00024                                |
| 42            | 9  | 34 | $\leftarrow$ | 43               | 8  | 35 | 1082.00476         | 0.00049                                |
| 22            | 12 | 10 | $\leftarrow$ | 23               | 13 | 11 | 1082.07710         | -0.00003                               |
| 25            | 10 | 15 | $\leftarrow$ | 26               | 11 | 16 | 1082.09439         | 0.00006                                |
| 43            | 6  | 37 | $\leftarrow$ | 44               | 7  | 38 | 1082.19140         | -0.00015                               |
| 41            | 8  | 33 | $\leftarrow$ | 42               | 9  | 34 | 1082.20672         | 0.00018                                |
| 23            | 11 | 12 | $\leftarrow$ | 24               | 12 | 13 | 1082.23095         | -0.00024                               |
| 42            | 8  | 35 | $\leftarrow$ | 43               | 7  | 36 | 1082.23575         | -0.00034                               |
| 41            | 9  | 33 | $\leftarrow$ | 42               | 8  | 34 | 1082.28781         | 0.00020                                |
| 47            | 0  | 47 | $\leftarrow$ | 48               | 1  | 48 | 1082.29344         | 0.00007                                |
| 47            | 1  | 47 | $\leftarrow$ | 48               | 0  | 48 | 1082.29344         | 0.00007                                |
| 43            | 6  | 38 | $\leftarrow$ | 44               | 5  | 39 | 1082.41173         | -0.00025                               |
| 43            | 5  | 38 | $\leftarrow$ | 44               | 6  | 39 | 1082.41173         | -0.00024                               |
| 41            | 7  | 34 | $\leftarrow$ | 42               | 8  | 35 | 1082.50186         | -0.00014                               |
| 41            | 8  | 34 | $\leftarrow$ | 42               | 7  | 35 | 1082.51069         | 0.00034                                |
| 46            | 1  | 46 | $\leftarrow$ | 47               | 0  | 47 | 1082.57838         | 0.00009                                |
| 46            | 0  | 46 | $\leftarrow$ | 47               | 1  | 47 | 1082.57838         | 0.00009                                |

---

|    |    |    |   |    |    |    |            |          |
|----|----|----|---|----|----|----|------------|----------|
| 43 | 5  | 39 | ← | 44 | 4  | 40 | 1082.62430 | -0.00030 |
| 43 | 4  | 39 | ← | 44 | 5  | 40 | 1082.62430 | -0.00030 |
| 39 | 8  | 31 | ← | 40 | 9  | 32 | 1082.66443 | 0.00030  |
| 42 | 5  | 37 | ← | 43 | 6  | 38 | 1082.68972 | -0.00011 |
| 42 | 6  | 37 | ← | 43 | 5  | 38 | 1082.68972 | -0.00013 |
| 41 | 7  | 35 | ← | 42 | 6  | 36 | 1082.74312 | -0.00034 |
| 41 | 6  | 35 | ← | 42 | 7  | 36 | 1082.74312 | 0.00032  |
| 40 | 7  | 33 | ← | 41 | 8  | 34 | 1082.76995 | -0.00011 |
| 40 | 8  | 33 | ← | 41 | 7  | 34 | 1082.78506 | 0.00027  |
| 43 | 4  | 40 | ← | 44 | 3  | 41 | 1082.83119 | -0.00035 |
| 43 | 3  | 40 | ← | 44 | 4  | 41 | 1082.83119 | -0.00035 |
| 38 | 8  | 30 | ← | 39 | 9  | 31 | 1082.85829 | 0.00061  |
| 45 | 0  | 45 | ← | 46 | 1  | 46 | 1082.86251 | -0.00013 |
| 45 | 1  | 45 | ← | 46 | 0  | 46 | 1082.86251 | -0.00013 |
| 18 | 13 | 5  | ← | 19 | 14 | 6  | 1082.88950 | 0.00023  |
| 42 | 4  | 38 | ← | 43 | 5  | 39 | 1082.90366 | -0.00008 |
| 42 | 5  | 38 | ← | 43 | 4  | 39 | 1082.90366 | -0.00008 |
| 41 | 6  | 36 | ← | 42 | 5  | 37 | 1082.96726 | 0.00021  |
| 41 | 5  | 36 | ← | 42 | 6  | 37 | 1082.96726 | 0.00025  |
| 27 | 8  | 19 | ← | 28 | 9  | 20 | 1083.01007 | 0.00041  |
| 19 | 12 | 7  | ← | 20 | 13 | 8  | 1083.03095 | -0.00023 |
| 43 | 2  | 41 | ← | 44 | 3  | 42 | 1083.03388 | -0.00024 |
| 43 | 3  | 41 | ← | 44 | 2  | 42 | 1083.03388 | -0.00024 |
| 39 | 8  | 32 | ← | 40 | 7  | 33 | 1083.06001 | -0.00020 |
| 16 | 14 | 2  | ← | 17 | 15 | 3  | 1083.07076 | 0.00037  |
| 42 | 3  | 39 | ← | 43 | 4  | 40 | 1083.11164 | -0.00007 |
| 42 | 4  | 39 | ← | 43 | 3  | 40 | 1083.11164 | -0.00007 |
| 36 | 8  | 28 | ← | 37 | 9  | 29 | 1083.12901 | 0.00006  |
| 44 | 0  | 44 | ← | 45 | 1  | 45 | 1083.14630 | -0.00011 |
| 44 | 1  | 44 | ← | 45 | 0  | 45 | 1083.14630 | -0.00011 |
| 33 | 8  | 25 | ← | 34 | 9  | 26 | 1083.16645 | 0.00037  |
| 41 | 5  | 37 | ← | 42 | 4  | 38 | 1083.18216 | -0.00009 |
| 41 | 4  | 37 | ← | 42 | 5  | 38 | 1083.18216 | -0.00009 |
| 34 | 8  | 26 | ← | 35 | 9  | 27 | 1083.20088 | 0.00049  |
| 43 | 2  | 42 | ← | 44 | 1  | 43 | 1083.23302 | -0.00024 |
| 43 | 1  | 42 | ← | 44 | 2  | 43 | 1083.23302 | -0.00024 |
| 40 | 6  | 35 | ← | 41 | 5  | 36 | 1083.24369 | 0.00012  |
| 40 | 5  | 35 | ← | 41 | 6  | 36 | 1083.24369 | 0.00019  |
| 38 | 7  | 31 | ← | 39 | 8  | 32 | 1083.29382 | 0.00011  |
| 42 | 2  | 40 | ← | 43 | 3  | 41 | 1083.31513 | -0.00005 |
| 42 | 3  | 40 | ← | 43 | 2  | 41 | 1083.31513 | -0.00005 |
| 38 | 8  | 31 | ← | 39 | 7  | 32 | 1083.33806 | 0.00014  |
| 41 | 3  | 38 | ← | 42 | 4  | 39 | 1083.39134 | 0.00007  |

---

---

|    |    |    |   |    |    |    |            |          |
|----|----|----|---|----|----|----|------------|----------|
| 41 | 4  | 38 | ← | 42 | 3  | 39 | 1083.39134 | 0.00007  |
| 43 | 1  | 43 | ← | 44 | 0  | 44 | 1083.42951 | -0.00009 |
| 43 | 0  | 43 | ← | 44 | 1  | 44 | 1083.42951 | -0.00009 |
| 40 | 4  | 36 | ← | 41 | 5  | 37 | 1083.46036 | 0.00022  |
| 40 | 5  | 36 | ← | 41 | 4  | 37 | 1083.46036 | 0.00021  |
| 19 | 11 | 8  | ← | 20 | 12 | 9  | 1083.49757 | 0.00012  |
| 42 | 1  | 41 | ← | 43 | 2  | 42 | 1083.51504 | -0.00008 |
| 42 | 2  | 41 | ← | 43 | 1  | 42 | 1083.51504 | -0.00008 |
| 39 | 6  | 34 | ← | 40 | 5  | 35 | 1083.51955 | 0.00014  |
| 39 | 5  | 34 | ← | 40 | 6  | 35 | 1083.51955 | 0.00029  |
| 37 | 7  | 30 | ← | 38 | 8  | 31 | 1083.54524 | 0.00025  |
| 38 | 7  | 32 | ← | 39 | 6  | 33 | 1083.56626 | 0.00020  |
| 41 | 2  | 39 | ← | 42 | 3  | 40 | 1083.59565 | 0.00001  |
| 41 | 3  | 39 | ← | 42 | 2  | 40 | 1083.59565 | 0.00001  |
| 38 | 10 | 29 | ← | 39 | 9  | 30 | 1083.61134 | -0.00012 |
| 37 | 8  | 30 | ← | 38 | 7  | 31 | 1083.62013 | 0.00006  |
| 20 | 10 | 10 | ← | 21 | 11 | 11 | 1083.65576 | -0.00005 |
| 40 | 3  | 37 | ← | 41 | 4  | 38 | 1083.67036 | 0.00012  |
| 40 | 4  | 37 | ← | 41 | 3  | 38 | 1083.67036 | 0.00012  |
| 42 | 0  | 42 | ← | 43 | 1  | 43 | 1083.71208 | -0.00015 |
| 42 | 1  | 42 | ← | 43 | 0  | 43 | 1083.71208 | -0.00015 |
| 39 | 5  | 35 | ← | 40 | 4  | 36 | 1083.73764 | 0.00024  |
| 39 | 4  | 35 | ← | 40 | 5  | 36 | 1083.73764 | 0.00024  |
| 36 | 7  | 29 | ← | 37 | 8  | 30 | 1083.78425 | -0.00020 |
| 38 | 6  | 33 | ← | 39 | 5  | 34 | 1083.79454 | -0.00001 |
| 38 | 5  | 33 | ← | 39 | 6  | 34 | 1083.79454 | 0.00026  |
| 41 | 1  | 40 | ← | 42 | 2  | 41 | 1083.79653 | 0.00013  |
| 41 | 2  | 40 | ← | 42 | 1  | 41 | 1083.79653 | 0.00013  |
| 37 | 6  | 31 | ← | 38 | 7  | 32 | 1083.83232 | 0.00018  |
| 37 | 7  | 31 | ← | 38 | 6  | 32 | 1083.83944 | 0.00002  |
| 15 | 13 | 2  | ← | 16 | 14 | 3  | 1083.84104 | 0.00039  |
| 40 | 2  | 38 | ← | 41 | 3  | 39 | 1083.87543 | -0.00009 |
| 40 | 3  | 38 | ← | 41 | 2  | 39 | 1083.87543 | -0.00009 |
| 39 | 4  | 36 | ← | 40 | 3  | 37 | 1083.94878 | 0.00017  |
| 39 | 3  | 36 | ← | 40 | 4  | 37 | 1083.94878 | 0.00017  |
| 41 | 0  | 41 | ← | 42 | 1  | 42 | 1083.99432 | 0.00005  |
| 41 | 1  | 41 | ← | 42 | 0  | 42 | 1083.99432 | 0.00005  |
| 35 | 7  | 28 | ← | 36 | 8  | 29 | 1084.00691 | 0.00043  |
| 38 | 4  | 34 | ← | 39 | 5  | 35 | 1084.01426 | 0.00025  |
| 38 | 5  | 34 | ← | 39 | 4  | 35 | 1084.01426 | 0.00024  |
| 37 | 6  | 32 | ← | 38 | 5  | 33 | 1084.06877 | -0.00024 |
| 37 | 5  | 32 | ← | 38 | 6  | 33 | 1084.06877 | 0.00028  |
| 40 | 1  | 39 | ← | 41 | 2  | 40 | 1084.07707 | -0.00003 |

---

---

|    |    |    |   |    |    |    |            |          |
|----|----|----|---|----|----|----|------------|----------|
| 40 | 2  | 39 | ← | 41 | 1  | 40 | 1084.07707 | -0.00003 |
| 36 | 6  | 30 | ← | 37 | 7  | 31 | 1084.10013 | 0.00017  |
| 36 | 7  | 30 | ← | 37 | 6  | 31 | 1084.11307 | 0.00015  |
| 39 | 3  | 37 | ← | 40 | 2  | 38 | 1084.15497 | 0.00016  |
| 39 | 2  | 37 | ← | 40 | 3  | 38 | 1084.15497 | 0.00016  |
| 35 | 8  | 28 | ← | 36 | 7  | 29 | 1084.21253 | -0.00011 |
| 38 | 4  | 35 | ← | 39 | 3  | 36 | 1084.22665 | 0.00028  |
| 38 | 3  | 35 | ← | 39 | 4  | 36 | 1084.22665 | 0.00028  |
| 40 | 0  | 40 | ← | 41 | 1  | 41 | 1084.27564 | -0.00011 |
| 40 | 1  | 40 | ← | 41 | 0  | 41 | 1084.27564 | -0.00011 |
| 37 | 5  | 33 | ← | 38 | 4  | 34 | 1084.29009 | 0.00009  |
| 37 | 4  | 33 | ← | 38 | 5  | 34 | 1084.29009 | 0.00012  |
| 36 | 5  | 31 | ← | 37 | 6  | 32 | 1084.34216 | 0.00033  |
| 36 | 6  | 31 | ← | 37 | 5  | 32 | 1084.34300 | 0.00019  |
| 21 | 8  | 13 | ← | 22 | 9  | 14 | 1084.35076 | 0.00053  |
| 39 | 2  | 38 | ← | 40 | 1  | 39 | 1084.35720 | -0.00002 |
| 39 | 1  | 38 | ← | 40 | 2  | 39 | 1084.35720 | -0.00002 |
| 35 | 6  | 29 | ← | 36 | 7  | 30 | 1084.36495 | 0.00046  |
| 35 | 7  | 29 | ← | 36 | 6  | 30 | 1084.38720 | -0.00013 |
| 38 | 2  | 36 | ← | 39 | 3  | 37 | 1084.43386 | 0.00034  |
| 38 | 3  | 36 | ← | 39 | 2  | 37 | 1084.43386 | 0.00034  |
| 19 | 9  | 10 | ← | 20 | 10 | 11 | 1084.45365 | -0.00004 |
| 25 | 7  | 18 | ← | 26 | 8  | 19 | 1084.47772 | 0.00047  |
| 37 | 3  | 34 | ← | 38 | 4  | 35 | 1084.50378 | 0.00026  |
| 37 | 4  | 34 | ← | 38 | 3  | 35 | 1084.50378 | 0.00026  |
| 34 | 8  | 27 | ← | 35 | 7  | 28 | 1084.53483 | -0.00027 |
| 39 | 0  | 39 | ← | 40 | 1  | 40 | 1084.55655 | -0.00009 |
| 39 | 1  | 39 | ← | 40 | 0  | 40 | 1084.55655 | -0.00009 |
| 36 | 4  | 32 | ← | 37 | 5  | 33 | 1084.56540 | 0.00013  |
| 36 | 5  | 32 | ← | 37 | 4  | 33 | 1084.56540 | 0.00007  |
| 30 | 7  | 23 | ← | 31 | 8  | 24 | 1084.58726 | 0.00054  |
| 14 | 12 | 2  | ← | 15 | 13 | 3  | 1084.61504 | -0.00027 |
| 34 | 6  | 28 | ← | 35 | 7  | 29 | 1084.62381 | -0.00035 |
| 34 | 6  | 28 | ← | 35 | 7  | 29 | 1084.62381 | -0.00035 |
| 38 | 2  | 37 | ← | 39 | 1  | 38 | 1084.63692 | 0.00016  |
| 38 | 1  | 37 | ← | 39 | 2  | 38 | 1084.63692 | 0.00016  |
| 20 | 8  | 12 | ← | 21 | 9  | 13 | 1084.64838 | 0.00028  |
| 25 | 22 | 3  | ← | 25 | 23 | 2  | 1084.70163 | 0.00079  |
| 37 | 2  | 35 | ← | 38 | 3  | 36 | 1084.71187 | 0.00024  |
| 37 | 3  | 35 | ← | 38 | 2  | 36 | 1084.71187 | 0.00024  |
| 15 | 11 | 4  | ← | 16 | 12 | 5  | 1084.76335 | -0.00016 |
| 36 | 3  | 33 | ← | 37 | 4  | 34 | 1084.78032 | 0.00025  |
| 36 | 4  | 33 | ← | 37 | 3  | 34 | 1084.78032 | 0.00025  |

---

---

|    |    |    |   |    |    |    |            |          |
|----|----|----|---|----|----|----|------------|----------|
| 38 | 1  | 38 | ← | 39 | 0  | 39 | 1084.83683 | -0.00013 |
| 38 | 0  | 38 | ← | 39 | 1  | 39 | 1084.83683 | -0.00013 |
| 35 | 5  | 31 | ← | 36 | 4  | 32 | 1084.83999 | -0.00001 |
| 35 | 4  | 31 | ← | 36 | 5  | 32 | 1084.83999 | 0.00010  |
| 37 | 2  | 36 | ← | 38 | 1  | 37 | 1084.91581 | 0.00009  |
| 37 | 1  | 36 | ← | 38 | 2  | 37 | 1084.91581 | 0.00009  |
| 16 | 10 | 6  | ← | 17 | 11 | 7  | 1084.91793 | 0.00025  |
| 34 | 9  | 26 | ← | 35 | 8  | 27 | 1084.92694 | -0.00061 |
| 36 | 2  | 34 | ← | 37 | 3  | 35 | 1084.98935 | 0.00019  |
| 36 | 3  | 34 | ← | 37 | 2  | 35 | 1084.98935 | 0.00019  |
| 35 | 4  | 32 | ← | 36 | 3  | 33 | 1085.05615 | 0.00014  |
| 35 | 3  | 32 | ← | 36 | 4  | 33 | 1085.05615 | 0.00015  |
| 17 | 9  | 8  | ← | 18 | 10 | 9  | 1085.08036 | -0.00007 |
| 38 | 11 | 28 | ← | 39 | 10 | 29 | 1085.11130 | -0.00070 |
| 34 | 5  | 30 | ← | 35 | 4  | 31 | 1085.11386 | -0.00016 |
| 34 | 4  | 30 | ← | 35 | 5  | 31 | 1085.11386 | 0.00005  |
| 37 | 1  | 37 | ← | 38 | 0  | 38 | 1085.11667 | -0.00004 |
| 37 | 0  | 37 | ← | 38 | 1  | 38 | 1085.11667 | -0.00004 |
| 23 | 21 | 3  | ← | 23 | 22 | 2  | 1085.14502 | -0.00020 |
| 33 | 5  | 28 | ← | 34 | 6  | 29 | 1085.15488 | -0.00007 |
| 33 | 6  | 28 | ← | 34 | 5  | 29 | 1085.16143 | 0.00037  |
| 36 | 1  | 35 | ← | 37 | 2  | 36 | 1085.19418 | 0.00008  |
| 36 | 2  | 35 | ← | 37 | 1  | 36 | 1085.19418 | 0.00008  |
| 32 | 7  | 26 | ← | 33 | 6  | 27 | 1085.23249 | -0.00023 |
| 35 | 3  | 33 | ← | 36 | 2  | 34 | 1085.26616 | 0.00007  |
| 35 | 2  | 33 | ← | 36 | 3  | 34 | 1085.26616 | 0.00007  |
| 43 | 0  | 43 | ← | 43 | 1  | 42 | 1085.29592 | -0.00012 |
| 43 | 1  | 43 | ← | 43 | 2  | 42 | 1085.29592 | -0.00012 |
| 34 | 4  | 31 | ← | 35 | 3  | 32 | 1085.33138 | 0.00005  |
| 34 | 3  | 31 | ← | 35 | 4  | 32 | 1085.33138 | 0.00006  |
| 31 | 6  | 25 | ← | 32 | 7  | 26 | 1085.34279 | 0.00008  |
| 33 | 4  | 29 | ← | 34 | 5  | 30 | 1085.38691 | -0.00008 |
| 36 | 1  | 36 | ← | 37 | 0  | 37 | 1085.39583 | -0.00005 |
| 36 | 0  | 36 | ← | 37 | 1  | 37 | 1085.39583 | -0.00005 |
| 32 | 5  | 27 | ← | 33 | 6  | 28 | 1085.42232 | -0.00020 |
| 32 | 6  | 27 | ← | 33 | 5  | 28 | 1085.43378 | 0.00023  |
| 32 | 6  | 27 | ← | 33 | 5  | 28 | 1085.43378 | 0.00023  |
| 35 | 1  | 34 | ← | 36 | 2  | 35 | 1085.47203 | 0.00014  |
| 35 | 2  | 34 | ← | 36 | 1  | 35 | 1085.47203 | 0.00014  |
| 33 | 9  | 25 | ← | 34 | 8  | 26 | 1085.51075 | -0.00090 |
| 31 | 7  | 25 | ← | 32 | 6  | 26 | 1085.53287 | -0.00012 |
| 31 | 7  | 25 | ← | 32 | 6  | 26 | 1085.53287 | -0.00012 |
| 25 | 20 | 6  | ← | 25 | 21 | 5  | 1085.53976 | -0.00011 |

---

---

|    |    |    |   |    |    |    |            |          |
|----|----|----|---|----|----|----|------------|----------|
| 34 | 2  | 32 | ← | 35 | 3  | 33 | 1085.54263 | 0.00019  |
| 34 | 3  | 32 | ← | 35 | 2  | 33 | 1085.54263 | 0.00019  |
| 30 | 6  | 24 | ← | 31 | 7  | 25 | 1085.54437 | 0.00023  |
| 42 | 0  | 42 | ← | 42 | 1  | 41 | 1085.54905 | -0.00016 |
| 42 | 1  | 42 | ← | 42 | 2  | 41 | 1085.54905 | -0.00016 |
| 23 | 20 | 3  | ← | 23 | 21 | 2  | 1085.56667 | 0.00007  |
| 33 | 3  | 30 | ← | 34 | 4  | 31 | 1085.60612 | 0.00011  |
| 33 | 4  | 30 | ← | 34 | 3  | 31 | 1085.60612 | 0.00009  |
| 32 | 5  | 28 | ← | 33 | 4  | 29 | 1085.65968 | -0.00043 |
| 32 | 4  | 28 | ← | 33 | 5  | 29 | 1085.65968 | 0.00032  |
| 35 | 0  | 35 | ← | 36 | 1  | 36 | 1085.67423 | -0.00024 |
| 35 | 1  | 35 | ← | 36 | 0  | 36 | 1085.67423 | -0.00024 |
| 31 | 5  | 26 | ← | 32 | 6  | 27 | 1085.68686 | -0.00027 |
| 31 | 6  | 26 | ← | 32 | 5  | 27 | 1085.70672 | -0.00010 |
| 12 | 11 | 1  | ← | 13 | 12 | 2  | 1085.70897 | -0.00001 |
| 29 | 6  | 23 | ← | 30 | 7  | 24 | 1085.71416 | 0.00038  |
| 34 | 2  | 33 | ← | 35 | 1  | 34 | 1085.74920 | 0.00009  |
| 34 | 1  | 33 | ← | 35 | 2  | 34 | 1085.74920 | 0.00009  |
| 39 | 19 | 20 | ← | 39 | 20 | 19 | 1085.78825 | -0.00023 |
| 33 | 3  | 31 | ← | 34 | 2  | 32 | 1085.81848 | 0.00029  |
| 33 | 2  | 31 | ← | 34 | 3  | 32 | 1085.81848 | 0.00029  |
| 30 | 7  | 24 | ← | 31 | 6  | 25 | 1085.85217 | -0.00005 |
| 13 | 10 | 3  | ← | 14 | 11 | 4  | 1085.86315 | -0.00021 |
| 32 | 4  | 29 | ← | 33 | 3  | 30 | 1085.88009 | -0.00001 |
| 32 | 3  | 29 | ← | 33 | 4  | 30 | 1085.88009 | 0.00002  |
| 30 | 5  | 25 | ← | 31 | 6  | 26 | 1085.94753 | 0.00016  |
| 34 | 0  | 34 | ← | 35 | 1  | 35 | 1085.95231 | -0.00018 |
| 34 | 1  | 34 | ← | 35 | 0  | 35 | 1085.95231 | -0.00018 |
| 25 | 19 | 6  | ← | 25 | 20 | 5  | 1085.96759 | -0.00028 |
| 23 | 6  | 17 | ← | 24 | 7  | 18 | 1085.97807 | 0.00052  |
| 30 | 6  | 25 | ← | 31 | 5  | 26 | 1085.98195 | -0.00009 |
| 33 | 1  | 32 | ← | 34 | 2  | 33 | 1086.02596 | 0.00021  |
| 33 | 2  | 32 | ← | 34 | 1  | 33 | 1086.02596 | 0.00021  |
| 21 | 6  | 15 | ← | 22 | 7  | 16 | 1086.03391 | 0.00013  |
| 40 | 0  | 40 | ← | 40 | 1  | 39 | 1086.05412 | 0.00024  |
| 40 | 1  | 40 | ← | 40 | 2  | 39 | 1086.05412 | 0.00024  |
| 32 | 3  | 30 | ← | 33 | 2  | 31 | 1086.09349 | 0.00014  |
| 32 | 2  | 30 | ← | 33 | 3  | 31 | 1086.09349 | 0.00014  |
| 31 | 4  | 28 | ← | 32 | 3  | 29 | 1086.15357 | 0.00002  |
| 31 | 3  | 28 | ← | 32 | 4  | 29 | 1086.15357 | 0.00009  |
| 30 | 4  | 26 | ← | 31 | 5  | 27 | 1086.20124 | -0.00002 |
| 30 | 5  | 26 | ← | 31 | 4  | 27 | 1086.20359 | -0.00031 |
| 33 | 1  | 33 | ← | 34 | 0  | 34 | 1086.22981 | -0.00012 |

---

---

|    |    |    |   |    |    |    |            |          |
|----|----|----|---|----|----|----|------------|----------|
| 33 | 0  | 33 | ← | 34 | 1  | 34 | 1086.22981 | -0.00012 |
| 38 | 18 | 20 | ← | 38 | 19 | 19 | 1086.25423 | -0.00021 |
| 19 | 6  | 13 | ← | 20 | 7  | 14 | 1086.25996 | 0.00026  |
| 32 | 1  | 31 | ← | 33 | 2  | 32 | 1086.30186 | 0.00006  |
| 32 | 2  | 31 | ← | 33 | 1  | 32 | 1086.30186 | 0.00006  |
| 42 | 2  | 40 | ← | 42 | 3  | 39 | 1086.31615 | -0.00001 |
| 42 | 3  | 40 | ← | 42 | 4  | 39 | 1086.31615 | -0.00001 |
| 31 | 18 | 13 | ← | 31 | 19 | 12 | 1086.32844 | 0.00023  |
| 30 | 18 | 12 | ← | 30 | 19 | 11 | 1086.34025 | 0.00001  |
| 34 | 10 | 25 | ← | 35 | 9  | 26 | 1086.35973 | -0.00085 |
| 31 | 3  | 29 | ← | 32 | 2  | 30 | 1086.36793 | 0.00002  |
| 31 | 2  | 29 | ← | 32 | 3  | 30 | 1086.36793 | 0.00002  |
| 25 | 18 | 7  | ← | 25 | 19 | 6  | 1086.40121 | -0.00058 |
| 30 | 4  | 27 | ← | 31 | 3  | 28 | 1086.42634 | -0.00004 |
| 28 | 5  | 23 | ← | 29 | 6  | 24 | 1086.44475 | 0.00033  |
| 43 | 4  | 40 | ← | 43 | 5  | 39 | 1086.46434 | -0.00025 |
| 43 | 3  | 40 | ← | 43 | 4  | 39 | 1086.46434 | -0.00025 |
| 29 | 4  | 25 | ← | 30 | 5  | 26 | 1086.47058 | 0.00024  |
| 32 | 1  | 32 | ← | 33 | 0  | 33 | 1086.50670 | -0.00010 |
| 32 | 0  | 32 | ← | 33 | 1  | 33 | 1086.50670 | -0.00010 |
| 31 | 1  | 30 | ← | 32 | 2  | 31 | 1086.57721 | -0.00006 |
| 31 | 2  | 30 | ← | 32 | 1  | 31 | 1086.57721 | -0.00006 |
| 28 | 7  | 22 | ← | 29 | 6  | 23 | 1086.58527 | -0.00014 |
| 30 | 3  | 28 | ← | 31 | 2  | 29 | 1086.64197 | 0.00009  |
| 30 | 2  | 28 | ← | 31 | 3  | 29 | 1086.64197 | 0.00010  |
| 27 | 5  | 22 | ← | 28 | 6  | 23 | 1086.67305 | 0.00028  |
| 39 | 2  | 38 | ← | 39 | 3  | 37 | 1086.68283 | 0.00011  |
| 39 | 1  | 38 | ← | 39 | 2  | 37 | 1086.68283 | 0.00011  |
| 29 | 4  | 26 | ← | 30 | 3  | 27 | 1086.69837 | -0.00021 |
| 29 | 3  | 26 | ← | 30 | 4  | 27 | 1086.69837 | 0.00006  |
| 40 | 17 | 23 | ← | 40 | 18 | 22 | 1086.71421 | 0.00030  |
| 42 | 3  | 39 | ← | 42 | 4  | 38 | 1086.71810 | -0.00004 |
| 42 | 4  | 39 | ← | 42 | 5  | 38 | 1086.71810 | -0.00004 |
| 38 | 17 | 21 | ← | 38 | 18 | 20 | 1086.72117 | 0.00005  |
| 28 | 4  | 24 | ← | 29 | 5  | 25 | 1086.73769 | 0.00007  |
| 28 | 5  | 24 | ← | 29 | 4  | 25 | 1086.74667 | 0.00007  |
| 31 | 0  | 31 | ← | 32 | 1  | 32 | 1086.78295 | -0.00013 |
| 31 | 1  | 31 | ← | 32 | 0  | 32 | 1086.78295 | -0.00013 |
| 30 | 17 | 13 | ← | 30 | 18 | 12 | 1086.78639 | -0.00030 |
| 29 | 8  | 22 | ← | 30 | 7  | 23 | 1086.79591 | -0.00078 |
| 10 | 10 | 0  | ← | 11 | 11 | 1  | 1086.80488 | -0.00019 |
| 40 | 3  | 38 | ← | 40 | 4  | 37 | 1086.82011 | -0.00036 |
| 40 | 2  | 38 | ← | 40 | 3  | 37 | 1086.82011 | -0.00036 |

---

---

|    |    |    |   |    |    |    |            |          |
|----|----|----|---|----|----|----|------------|----------|
| 25 | 17 | 9  | ← | 25 | 18 | 8  | 1086.84149 | -0.00040 |
| 27 | 6  | 22 | ← | 28 | 5  | 23 | 1086.84385 | -0.00047 |
| 30 | 1  | 29 | ← | 31 | 2  | 30 | 1086.85219 | 0.00003  |
| 30 | 2  | 29 | ← | 31 | 1  | 30 | 1086.85219 | 0.00003  |
| 31 | 9  | 23 | ← | 32 | 8  | 24 | 1086.85590 | -0.00044 |
| 43 | 5  | 39 | ← | 43 | 6  | 38 | 1086.88189 | -0.00045 |
| 43 | 4  | 39 | ← | 43 | 5  | 38 | 1086.88189 | -0.00046 |
| 21 | 17 | 4  | ← | 21 | 18 | 3  | 1086.88631 | -0.00040 |
| 20 | 17 | 3  | ← | 20 | 18 | 2  | 1086.89705 | -0.00051 |
| 29 | 3  | 27 | ← | 30 | 2  | 28 | 1086.91519 | -0.00005 |
| 29 | 2  | 27 | ← | 30 | 3  | 28 | 1086.91519 | -0.00004 |
| 38 | 1  | 37 | ← | 38 | 2  | 36 | 1086.93346 | 0.00006  |
| 38 | 2  | 37 | ← | 38 | 3  | 36 | 1086.93346 | 0.00006  |
| 28 | 4  | 25 | ← | 29 | 3  | 26 | 1086.96991 | -0.00026 |
| 41 | 4  | 38 | ← | 41 | 5  | 37 | 1086.97159 | 0.00029  |
| 41 | 3  | 38 | ← | 41 | 4  | 37 | 1086.97159 | 0.00029  |
| 27 | 4  | 23 | ← | 28 | 5  | 24 | 1087.00263 | 0.00030  |
| 27 | 4  | 23 | ← | 28 | 5  | 24 | 1087.00263 | 0.00030  |
| 27 | 5  | 23 | ← | 28 | 4  | 24 | 1087.01833 | -0.00028 |
| 27 | 7  | 21 | ← | 28 | 6  | 22 | 1087.02040 | -0.00033 |
| 30 | 1  | 30 | ← | 31 | 0  | 31 | 1087.05868 | -0.00011 |
| 30 | 0  | 30 | ← | 31 | 1  | 31 | 1087.05868 | -0.00011 |
| 44 | 5  | 39 | ← | 44 | 6  | 38 | 1087.06362 | -0.00037 |
| 44 | 6  | 39 | ← | 44 | 7  | 38 | 1087.06362 | -0.00032 |
| 39 | 3  | 37 | ← | 39 | 4  | 36 | 1087.07208 | 0.00017  |
| 39 | 2  | 37 | ← | 39 | 3  | 36 | 1087.07208 | 0.00017  |
| 29 | 1  | 28 | ← | 30 | 2  | 29 | 1087.12625 | -0.00021 |
| 29 | 2  | 28 | ← | 30 | 1  | 29 | 1087.12625 | -0.00021 |
| 42 | 4  | 38 | ← | 42 | 5  | 37 | 1087.13759 | 0.00010  |
| 42 | 5  | 38 | ← | 42 | 6  | 37 | 1087.13759 | 0.00011  |
| 37 | 1  | 36 | ← | 37 | 2  | 35 | 1087.18354 | 0.00000  |
| 37 | 2  | 36 | ← | 37 | 3  | 35 | 1087.18354 | 0.00000  |
| 28 | 2  | 26 | ← | 29 | 3  | 27 | 1087.18813 | 0.00015  |
| 28 | 3  | 26 | ← | 29 | 2  | 27 | 1087.18813 | 0.00013  |
| 24 | 5  | 19 | ← | 25 | 6  | 20 | 1087.19773 | 0.00018  |
| 38 | 16 | 22 | ← | 38 | 17 | 21 | 1087.20221 | 0.00002  |
| 49 | 8  | 41 | ← | 49 | 9  | 40 | 1087.21179 | -0.00028 |
| 40 | 3  | 37 | ← | 40 | 4  | 36 | 1087.22380 | -0.00030 |
| 40 | 4  | 37 | ← | 40 | 5  | 36 | 1087.22380 | -0.00029 |
| 26 | 4  | 22 | ← | 27 | 5  | 23 | 1087.26302 | -0.00018 |
| 27 | 16 | 11 | ← | 27 | 17 | 10 | 1087.26841 | -0.00030 |
| 26 | 5  | 22 | ← | 27 | 4  | 23 | 1087.29192 | -0.00037 |
| 13 | 7  | 6  | ← | 14 | 8  | 7  | 1087.30647 | -0.00014 |

---

---

|    |    |    |   |    |    |    |            |          |
|----|----|----|---|----|----|----|------------|----------|
| 22 | 16 | 6  | ← | 22 | 17 | 5  | 1087.31881 | -0.00057 |
| 43 | 5  | 38 | ← | 43 | 6  | 37 | 1087.32227 | 0.00013  |
| 43 | 6  | 38 | ← | 43 | 7  | 37 | 1087.32227 | 0.00023  |
| 29 | 0  | 29 | ← | 30 | 1  | 30 | 1087.33382 | -0.00011 |
| 29 | 1  | 29 | ← | 30 | 0  | 30 | 1087.33382 | -0.00011 |
| 19 | 16 | 3  | ← | 19 | 17 | 2  | 1087.34951 | -0.00038 |
| 17 | 16 | 1  | ← | 17 | 17 | 0  | 1087.36895 | -0.00038 |
| 41 | 5  | 37 | ← | 41 | 6  | 36 | 1087.39244 | 0.00002  |
| 41 | 4  | 37 | ← | 41 | 5  | 36 | 1087.39244 | 0.00000  |
| 28 | 1  | 27 | ← | 29 | 2  | 28 | 1087.40018 | 0.00000  |
| 28 | 2  | 27 | ← | 29 | 1  | 28 | 1087.40018 | 0.00000  |
| 28 | 8  | 21 | ← | 29 | 7  | 22 | 1087.42155 | -0.00010 |
| 36 | 1  | 35 | ← | 36 | 2  | 34 | 1087.43348 | 0.00031  |
| 36 | 2  | 35 | ← | 36 | 3  | 34 | 1087.43348 | 0.00031  |
| 27 | 2  | 25 | ← | 28 | 3  | 26 | 1087.46003 | -0.00009 |
| 27 | 3  | 25 | ← | 28 | 2  | 26 | 1087.46003 | -0.00013 |
| 52 | 16 | 37 | ← | 52 | 17 | 36 | 1087.46635 | 0.00032  |
| 39 | 4  | 36 | ← | 39 | 5  | 35 | 1087.47668 | 0.00014  |
| 39 | 3  | 36 | ← | 39 | 4  | 35 | 1087.47668 | 0.00014  |
| 25 | 6  | 20 | ← | 26 | 5  | 21 | 1087.50113 | 0.00006  |
| 26 | 3  | 23 | ← | 27 | 4  | 24 | 1087.50939 | -0.00039 |
| 26 | 4  | 23 | ← | 27 | 3  | 24 | 1087.51136 | -0.00036 |
| 25 | 4  | 21 | ← | 26 | 5  | 22 | 1087.51835 | 0.00015  |
| 34 | 0  | 34 | ← | 34 | 1  | 33 | 1087.55428 | -0.00013 |
| 34 | 1  | 34 | ← | 34 | 2  | 33 | 1087.55428 | -0.00013 |
| 37 | 3  | 35 | ← | 37 | 4  | 34 | 1087.57382 | 0.00041  |
| 37 | 2  | 35 | ← | 37 | 3  | 34 | 1087.57382 | 0.00041  |
| 42 | 5  | 37 | ← | 42 | 6  | 36 | 1087.58057 | 0.00016  |
| 17 | 5  | 12 | ← | 18 | 6  | 13 | 1087.60301 | 0.00015  |
| 28 | 1  | 28 | ← | 29 | 0  | 29 | 1087.60843 | -0.00005 |
| 28 | 0  | 28 | ← | 29 | 1  | 29 | 1087.60843 | -0.00005 |
| 27 | 1  | 26 | ← | 28 | 2  | 27 | 1087.67333 | 0.00001  |
| 27 | 2  | 26 | ← | 28 | 1  | 27 | 1087.67333 | 0.00001  |
| 26 | 2  | 24 | ← | 27 | 3  | 25 | 1087.73148 | -0.00015 |
| 26 | 3  | 24 | ← | 27 | 2  | 25 | 1087.73148 | -0.00023 |
| 24 | 15 | 9  | ← | 24 | 16 | 8  | 1087.75061 | -0.00053 |
| 45 | 8  | 38 | ← | 45 | 9  | 37 | 1087.76362 | 0.00007  |
| 45 | 7  | 38 | ← | 45 | 8  | 37 | 1087.76847 | 0.00002  |
| 25 | 3  | 22 | ← | 26 | 4  | 23 | 1087.77830 | 0.00007  |
| 25 | 4  | 22 | ← | 26 | 3  | 23 | 1087.78198 | 0.00008  |
| 43 | 7  | 37 | ← | 43 | 8  | 36 | 1087.79182 | -0.00009 |
| 44 | 15 | 30 | ← | 44 | 16 | 29 | 1087.79402 | 0.00022  |
| 33 | 1  | 33 | ← | 33 | 2  | 32 | 1087.80271 | 0.00017  |

---

---

|    |    |    |   |    |    |    |            |          |
|----|----|----|---|----|----|----|------------|----------|
| 33 | 0  | 33 | ← | 33 | 1  | 32 | 1087.80271 | 0.00017  |
| 17 | 15 | 2  | ← | 17 | 16 | 1  | 1087.81542 | -0.00021 |
| 16 | 15 | 1  | ← | 16 | 16 | 0  | 1087.82420 | -0.00030 |
| 16 | 15 | 2  | ← | 16 | 16 | 1  | 1087.82420 | -0.00030 |
| 41 | 6  | 36 | ← | 41 | 7  | 35 | 1087.83853 | -0.00001 |
| 24 | 5  | 20 | ← | 25 | 4  | 21 | 1087.85246 | -0.00021 |
| 24 | 6  | 19 | ← | 25 | 5  | 20 | 1087.87899 | -0.00012 |
| 27 | 1  | 27 | ← | 28 | 0  | 28 | 1087.88240 | -0.00005 |
| 27 | 0  | 27 | ← | 28 | 1  | 28 | 1087.88240 | -0.00005 |
| 39 | 4  | 35 | ← | 39 | 5  | 34 | 1087.90205 | 0.00009  |
| 39 | 5  | 35 | ← | 39 | 6  | 34 | 1087.90205 | 0.00017  |
| 34 | 1  | 33 | ← | 34 | 2  | 32 | 1087.93097 | 0.00010  |
| 34 | 2  | 33 | ← | 34 | 3  | 32 | 1087.93097 | 0.00010  |
| 26 | 1  | 25 | ← | 27 | 2  | 26 | 1087.94583 | -0.00004 |
| 26 | 2  | 25 | ← | 27 | 1  | 26 | 1087.94583 | -0.00004 |
| 37 | 4  | 34 | ← | 37 | 5  | 33 | 1087.98063 | 0.00014  |
| 37 | 3  | 34 | ← | 37 | 4  | 33 | 1087.98063 | 0.00012  |
| 23 | 4  | 19 | ← | 24 | 5  | 20 | 1087.99648 | -0.00010 |
| 25 | 2  | 23 | ← | 26 | 3  | 24 | 1088.00245 | -0.00005 |
| 25 | 3  | 23 | ← | 26 | 2  | 24 | 1088.00245 | -0.00022 |
| 24 | 3  | 21 | ← | 25 | 4  | 22 | 1088.04484 | -0.00032 |
| 32 | 0  | 32 | ← | 32 | 1  | 31 | 1088.05016 | 0.00004  |
| 32 | 1  | 32 | ← | 32 | 2  | 31 | 1088.05016 | 0.00004  |
| 24 | 4  | 21 | ← | 25 | 3  | 22 | 1088.05179 | -0.00023 |
| 42 | 7  | 36 | ← | 42 | 8  | 35 | 1088.05499 | -0.00030 |
| 42 | 6  | 36 | ← | 42 | 7  | 35 | 1088.05763 | -0.00017 |
| 40 | 6  | 35 | ← | 40 | 7  | 34 | 1088.09709 | 0.00001  |
| 12 | 6  | 6  | ← | 13 | 7  | 7  | 1088.11500 | 0.00035  |
| 23 | 5  | 19 | ← | 24 | 4  | 20 | 1088.14655 | 0.00022  |
| 26 | 1  | 26 | ← | 27 | 0  | 27 | 1088.15588 | 0.00003  |
| 26 | 0  | 26 | ← | 27 | 1  | 27 | 1088.15588 | 0.00003  |
| 33 | 1  | 32 | ← | 33 | 2  | 31 | 1088.17900 | 0.00005  |
| 33 | 2  | 32 | ← | 33 | 3  | 31 | 1088.17900 | 0.00005  |
| 25 | 14 | 12 | ← | 25 | 15 | 11 | 1088.20402 | -0.00013 |
| 22 | 4  | 18 | ← | 23 | 5  | 19 | 1088.20952 | 0.00021  |
| 25 | 2  | 24 | ← | 26 | 1  | 25 | 1088.21783 | 0.00000  |
| 25 | 1  | 24 | ← | 26 | 2  | 25 | 1088.21783 | 0.00000  |
| 38 | 14 | 25 | ← | 38 | 15 | 24 | 1088.22607 | 0.00007  |
| 36 | 3  | 33 | ← | 36 | 4  | 32 | 1088.23243 | 0.00034  |
| 36 | 4  | 33 | ← | 36 | 5  | 32 | 1088.23243 | 0.00037  |
| 20 | 14 | 6  | ← | 20 | 15 | 5  | 1088.24210 | -0.00034 |
| 24 | 2  | 22 | ← | 25 | 3  | 23 | 1088.27274 | 0.00004  |
| 24 | 3  | 22 | ← | 25 | 2  | 23 | 1088.27274 | -0.00029 |

---

---

|    |    |    |   |    |    |    |            |          |
|----|----|----|---|----|----|----|------------|----------|
| 16 | 14 | 3  | ← | 16 | 15 | 2  | 1088.27584 | -0.00005 |
| 23 | 6  | 18 | ← | 24 | 5  | 19 | 1088.30269 | -0.00052 |
| 23 | 3  | 20 | ← | 24 | 4  | 21 | 1088.30980 | -0.00014 |
| 43 | 7  | 36 | ← | 43 | 8  | 35 | 1088.31679 | 0.00001  |
| 41 | 7  | 35 | ← | 41 | 8  | 34 | 1088.31901 | -0.00022 |
| 23 | 4  | 20 | ← | 24 | 3  | 21 | 1088.32251 | -0.00009 |
| 34 | 2  | 32 | ← | 34 | 3  | 31 | 1088.32269 | 0.00026  |
| 34 | 3  | 32 | ← | 34 | 4  | 31 | 1088.32269 | 0.00027  |
| 42 | 14 | 28 | ← | 42 | 15 | 27 | 1088.33574 | 0.00031  |
| 39 | 6  | 34 | ← | 39 | 7  | 33 | 1088.35610 | 0.00019  |
| 37 | 4  | 33 | ← | 37 | 5  | 32 | 1088.41148 | 0.00004  |
| 37 | 5  | 33 | ← | 37 | 6  | 32 | 1088.41148 | 0.00033  |
| 25 | 1  | 25 | ← | 26 | 0  | 26 | 1088.42864 | -0.00003 |
| 25 | 0  | 25 | ← | 26 | 1  | 26 | 1088.42864 | -0.00003 |
| 47 | 9  | 38 | ← | 47 | 10 | 37 | 1088.43569 | -0.00004 |
| 35 | 4  | 32 | ← | 35 | 5  | 31 | 1088.48366 | 0.00024  |
| 35 | 3  | 32 | ← | 35 | 4  | 31 | 1088.48366 | 0.00018  |
| 24 | 1  | 23 | ← | 25 | 2  | 24 | 1088.48912 | -0.00008 |
| 24 | 2  | 23 | ← | 25 | 1  | 24 | 1088.48912 | -0.00009 |
| 45 | 14 | 31 | ← | 45 | 15 | 30 | 1088.51584 | 0.00012  |
| 23 | 3  | 21 | ← | 24 | 2  | 22 | 1088.54252 | -0.00032 |
| 23 | 2  | 21 | ← | 24 | 3  | 22 | 1088.54252 | 0.00033  |
| 20 | 4  | 16 | ← | 21 | 5  | 17 | 1088.54954 | 0.00032  |
| 22 | 3  | 19 | ← | 23 | 4  | 20 | 1088.57150 | 0.00001  |
| 33 | 2  | 31 | ← | 33 | 3  | 30 | 1088.57150 | 0.00019  |
| 33 | 3  | 31 | ← | 33 | 4  | 30 | 1088.57150 | 0.00020  |
| 44 | 9  | 36 | ← | 44 | 10 | 35 | 1088.57772 | 0.00018  |
| 40 | 7  | 34 | ← | 40 | 8  | 33 | 1088.58402 | 0.00030  |
| 40 | 6  | 34 | ← | 40 | 7  | 33 | 1088.59148 | -0.00006 |
| 22 | 4  | 19 | ← | 23 | 3  | 20 | 1088.59429 | -0.00024 |
| 42 | 7  | 35 | ← | 42 | 8  | 34 | 1088.59686 | 0.00000  |
| 38 | 6  | 33 | ← | 38 | 7  | 32 | 1088.61494 | -0.00017 |
| 44 | 8  | 36 | ← | 44 | 9  | 35 | 1088.64831 | -0.00007 |
| 36 | 4  | 32 | ← | 36 | 5  | 31 | 1088.66648 | 0.00007  |
| 19 | 4  | 15 | ← | 20 | 5  | 16 | 1088.66919 | 0.00048  |
| 31 | 1  | 30 | ← | 31 | 2  | 29 | 1088.67360 | -0.00004 |
| 31 | 2  | 30 | ← | 31 | 3  | 29 | 1088.67360 | -0.00004 |
| 24 | 13 | 12 | ← | 24 | 14 | 11 | 1088.67948 | 0.00000  |
| 24 | 1  | 24 | ← | 25 | 0  | 25 | 1088.70086 | -0.00005 |
| 24 | 0  | 24 | ← | 25 | 1  | 25 | 1088.70086 | -0.00005 |
| 35 | 13 | 22 | ← | 35 | 14 | 21 | 1088.71945 | 0.00008  |
| 34 | 3  | 31 | ← | 34 | 4  | 30 | 1088.73505 | 0.00034  |
| 34 | 4  | 31 | ← | 34 | 5  | 30 | 1088.73505 | 0.00045  |

---

---

|    |    |    |   |    |    |    |            |          |
|----|----|----|---|----|----|----|------------|----------|
| 23 | 2  | 22 | ← | 24 | 1  | 23 | 1088.75992 | -0.00007 |
| 23 | 1  | 22 | ← | 24 | 2  | 23 | 1088.75992 | -0.00005 |
| 37 | 13 | 24 | ← | 37 | 14 | 23 | 1088.76495 | 0.00043  |
| 46 | 9  | 37 | ← | 46 | 10 | 36 | 1088.77330 | -0.00019 |
| 38 | 13 | 26 | ← | 38 | 14 | 25 | 1088.78303 | -0.00011 |
| 21 | 5  | 17 | ← | 22 | 4  | 18 | 1088.79044 | -0.00049 |
| 22 | 2  | 20 | ← | 23 | 3  | 21 | 1088.81052 | -0.00034 |
| 32 | 3  | 30 | ← | 32 | 4  | 29 | 1088.81987 | 0.00005  |
| 32 | 2  | 30 | ← | 32 | 3  | 29 | 1088.81987 | 0.00003  |
| 21 | 3  | 18 | ← | 22 | 4  | 19 | 1088.82818 | 0.00013  |
| 41 | 8  | 34 | ← | 41 | 9  | 33 | 1088.84202 | 0.00035  |
| 39 | 7  | 33 | ← | 39 | 8  | 32 | 1088.84860 | -0.00002 |
| 21 | 4  | 18 | ← | 22 | 3  | 19 | 1088.86942 | 0.00009  |
| 37 | 6  | 32 | ← | 37 | 7  | 31 | 1088.87462 | -0.00007 |
| 37 | 5  | 32 | ← | 37 | 6  | 31 | 1088.87859 | -0.00005 |
| 41 | 7  | 34 | ← | 41 | 8  | 33 | 1088.88342 | 0.00027  |
| 16 | 4  | 12 | ← | 17 | 5  | 13 | 1088.89373 | 0.00059  |
| 35 | 5  | 31 | ← | 35 | 6  | 30 | 1088.92091 | 0.00020  |
| 43 | 8  | 35 | ← | 43 | 9  | 34 | 1088.96224 | -0.00004 |
| 23 | 0  | 23 | ← | 24 | 1  | 24 | 1088.97262 | 0.00005  |
| 23 | 1  | 23 | ← | 24 | 0  | 24 | 1088.97262 | 0.00005  |
| 33 | 4  | 30 | ← | 33 | 5  | 29 | 1088.98554 | -0.00011 |
| 33 | 3  | 30 | ← | 33 | 4  | 29 | 1088.98554 | -0.00033 |
| 48 | 10 | 38 | ← | 48 | 11 | 37 | 1089.01167 | 0.00009  |
| 22 | 2  | 21 | ← | 23 | 1  | 22 | 1089.03016 | -0.00003 |
| 22 | 1  | 21 | ← | 23 | 2  | 22 | 1089.03016 | 0.00001  |
| 42 | 13 | 29 | ← | 42 | 14 | 28 | 1089.04091 | 0.00030  |
| 14 | 4  | 10 | ← | 15 | 5  | 11 | 1089.06077 | 0.00053  |
| 31 | 2  | 29 | ← | 31 | 3  | 28 | 1089.06790 | -0.00015 |
| 31 | 3  | 29 | ← | 31 | 4  | 28 | 1089.06790 | -0.00011 |
| 20 | 3  | 17 | ← | 21 | 4  | 18 | 1089.07658 | -0.00031 |
| 21 | 2  | 19 | ← | 22 | 3  | 20 | 1089.07847 | -0.00011 |
| 21 | 3  | 19 | ← | 22 | 2  | 20 | 1089.08084 | -0.00021 |
| 45 | 9  | 36 | ← | 45 | 10 | 35 | 1089.13415 | 0.00008  |
| 20 | 5  | 16 | ← | 21 | 4  | 17 | 1089.15864 | -0.00044 |
| 29 | 2  | 28 | ← | 29 | 3  | 27 | 1089.16681 | 0.00040  |
| 29 | 1  | 28 | ← | 29 | 2  | 27 | 1089.16681 | 0.00039  |
| 29 | 12 | 18 | ← | 29 | 13 | 17 | 1089.17177 | 0.00006  |
| 34 | 5  | 30 | ← | 34 | 6  | 29 | 1089.17559 | -0.00016 |
| 7  | 7  | 0  | ← | 8  | 8  | 1  | 1089.17803 | 0.00036  |
| 19 | 12 | 8  | ← | 19 | 13 | 7  | 1089.17803 | 0.00044  |
| 34 | 4  | 30 | ← | 34 | 5  | 29 | 1089.17803 | 0.00041  |
| 40 | 7  | 33 | ← | 40 | 8  | 32 | 1089.17803 | -0.00019 |

---

---

|    |    |    |   |    |    |    |            |          |
|----|----|----|---|----|----|----|------------|----------|
| 13 | 4  | 9  | ← | 14 | 5  | 10 | 1089.18676 | 0.00021  |
| 32 | 4  | 29 | ← | 32 | 5  | 28 | 1089.23648 | -0.00015 |
| 22 | 1  | 22 | ← | 23 | 0  | 23 | 1089.24372 | 0.00007  |
| 22 | 0  | 22 | ← | 23 | 1  | 23 | 1089.24372 | 0.00007  |
| 21 | 2  | 20 | ← | 22 | 1  | 21 | 1089.29978 | -0.00003 |
| 21 | 1  | 20 | ← | 22 | 2  | 21 | 1089.29978 | 0.00006  |
| 21 | 6  | 16 | ← | 22 | 5  | 17 | 1089.30574 | -0.00069 |
| 30 | 2  | 28 | ← | 30 | 3  | 27 | 1089.31590 | -0.00008 |
| 30 | 3  | 28 | ← | 30 | 4  | 27 | 1089.31590 | 0.00000  |
| 36 | 12 | 24 | ← | 36 | 13 | 23 | 1089.33775 | 0.00056  |
| 20 | 2  | 18 | ← | 21 | 3  | 19 | 1089.34489 | -0.00016 |
| 20 | 3  | 18 | ← | 21 | 2  | 19 | 1089.34948 | -0.00030 |
| 39 | 8  | 32 | ← | 39 | 9  | 31 | 1089.37553 | -0.00011 |
| 37 | 7  | 31 | ← | 37 | 8  | 30 | 1089.37820 | 0.00005  |
| 50 | 11 | 39 | ← | 50 | 12 | 38 | 1089.38691 | 0.00009  |
| 37 | 12 | 25 | ← | 37 | 13 | 24 | 1089.39488 | 0.00019  |
| 35 | 6  | 30 | ← | 35 | 7  | 29 | 1089.39488 | 0.00007  |
| 35 | 5  | 30 | ← | 35 | 6  | 29 | 1089.40714 | 0.00004  |
| 28 | 2  | 27 | ← | 28 | 3  | 26 | 1089.41199 | -0.00013 |
| 28 | 1  | 27 | ← | 28 | 2  | 26 | 1089.41199 | -0.00014 |
| 37 | 6  | 31 | ← | 37 | 7  | 30 | 1089.41715 | -0.00009 |
| 33 | 5  | 29 | ← | 33 | 6  | 28 | 1089.43106 | 0.00006  |
| 33 | 4  | 29 | ← | 33 | 5  | 28 | 1089.43434 | -0.00005 |
| 19 | 4  | 16 | ← | 20 | 3  | 17 | 1089.43846 | -0.00023 |
| 39 | 7  | 32 | ← | 39 | 8  | 31 | 1089.48525 | -0.00035 |
| 31 | 3  | 28 | ← | 31 | 4  | 27 | 1089.48818 | -0.00020 |
| 21 | 1  | 21 | ← | 22 | 0  | 22 | 1089.51419 | 0.00004  |
| 21 | 0  | 21 | ← | 22 | 1  | 22 | 1089.51419 | 0.00004  |
| 44 | 9  | 35 | ← | 44 | 10 | 34 | 1089.52190 | 0.00039  |
| 26 | 1  | 26 | ← | 26 | 2  | 25 | 1089.52413 | 0.00007  |
| 26 | 0  | 26 | ← | 26 | 1  | 25 | 1089.52413 | 0.00007  |
| 18 | 3  | 15 | ← | 19 | 4  | 16 | 1089.53367 | -0.00016 |
| 29 | 3  | 27 | ← | 29 | 4  | 26 | 1089.56327 | -0.00025 |
| 29 | 2  | 27 | ← | 29 | 3  | 26 | 1089.56327 | -0.00041 |
| 20 | 2  | 19 | ← | 21 | 1  | 20 | 1089.56878 | -0.00006 |
| 20 | 1  | 19 | ← | 21 | 2  | 20 | 1089.56878 | 0.00010  |
| 19 | 3  | 17 | ← | 20 | 2  | 18 | 1089.61865 | -0.00010 |
| 40 | 9  | 32 | ← | 40 | 10 | 31 | 1089.62199 | -0.00025 |
| 38 | 8  | 31 | ← | 38 | 9  | 30 | 1089.63616 | -0.00017 |
| 36 | 13 | 24 | ← | 37 | 12 | 25 | 1089.64008 | -0.00031 |
| 20 | 11 | 9  | ← | 20 | 12 | 8  | 1089.64974 | 0.00020  |
| 19 | 11 | 8  | ← | 19 | 12 | 7  | 1089.65256 | 0.00003  |
| 19 | 11 | 9  | ← | 19 | 12 | 8  | 1089.65256 | 0.00003  |

---

---

|    |    |    |   |    |    |    |            |          |
|----|----|----|---|----|----|----|------------|----------|
| 34 | 6  | 29 | ← | 34 | 7  | 28 | 1089.65492 | 0.00002  |
| 27 | 1  | 26 | ← | 27 | 2  | 25 | 1089.65729 | -0.00012 |
| 27 | 2  | 26 | ← | 27 | 3  | 25 | 1089.65729 | -0.00009 |
| 16 | 11 | 5  | ← | 16 | 12 | 4  | 1089.66645 | 0.00052  |
| 15 | 11 | 4  | ← | 15 | 12 | 3  | 1089.67123 | -0.00013 |
| 34 | 5  | 29 | ← | 34 | 6  | 28 | 1089.67606 | -0.00008 |
| 13 | 11 | 3  | ← | 13 | 12 | 2  | 1089.68341 | 0.00054  |
| 32 | 5  | 28 | ← | 32 | 6  | 27 | 1089.68683 | 0.00041  |
| 32 | 4  | 28 | ← | 32 | 5  | 27 | 1089.69226 | -0.00025 |
| 29 | 11 | 18 | ← | 29 | 12 | 17 | 1089.70123 | 0.00006  |
| 36 | 6  | 30 | ← | 36 | 7  | 29 | 1089.70600 | 0.00006  |
| 27 | 9  | 19 | ← | 28 | 8  | 20 | 1089.72580 | -0.00069 |
| 17 | 3  | 14 | ← | 18 | 4  | 15 | 1089.73083 | 0.00033  |
| 30 | 4  | 27 | ← | 30 | 5  | 26 | 1089.73864 | 0.00011  |
| 20 | 1  | 20 | ← | 21 | 0  | 21 | 1089.78406 | -0.00001 |
| 20 | 0  | 20 | ← | 21 | 1  | 21 | 1089.78406 | -0.00001 |
| 28 | 3  | 26 | ← | 28 | 4  | 25 | 1089.81048 | -0.00044 |
| 34 | 11 | 24 | ← | 34 | 12 | 23 | 1089.82263 | 0.00020  |
| 19 | 1  | 18 | ← | 20 | 2  | 19 | 1089.83699 | 0.00001  |
| 35 | 11 | 25 | ← | 35 | 12 | 24 | 1089.85167 | 0.00000  |
| 39 | 9  | 31 | ← | 39 | 10 | 30 | 1089.85528 | 0.00011  |
| 18 | 2  | 16 | ← | 19 | 3  | 17 | 1089.87191 | -0.00009 |
| 36 | 11 | 26 | ← | 36 | 12 | 25 | 1089.87763 | 0.00006  |
| 18 | 3  | 16 | ← | 19 | 2  | 17 | 1089.88874 | 0.00007  |
| 26 | 1  | 25 | ← | 26 | 2  | 24 | 1089.90190 | -0.00038 |
| 26 | 2  | 25 | ← | 26 | 3  | 24 | 1089.90190 | -0.00033 |
| 33 | 6  | 28 | ← | 33 | 7  | 27 | 1089.91414 | -0.00015 |
| 40 | 10 | 31 | ← | 40 | 11 | 30 | 1089.93956 | -0.00012 |
| 31 | 5  | 27 | ← | 31 | 6  | 26 | 1089.94187 | 0.00000  |
| 33 | 5  | 28 | ← | 33 | 6  | 27 | 1089.95053 | 0.00009  |
| 31 | 4  | 27 | ← | 31 | 5  | 26 | 1089.95250 | -0.00019 |
| 6  | 6  | 0  | ← | 7  | 7  | 1  | 1089.97794 | 0.00063  |
| 35 | 11 | 24 | ← | 35 | 12 | 23 | 1089.98954 | 0.00023  |
| 29 | 4  | 26 | ← | 29 | 5  | 25 | 1089.98954 | 0.00003  |
| 29 | 3  | 26 | ← | 29 | 4  | 25 | 1089.99197 | -0.00032 |
| 35 | 6  | 29 | ← | 35 | 7  | 28 | 1090.00636 | 0.00004  |
| 18 | 5  | 14 | ← | 19 | 4  | 15 | 1090.02585 | -0.00025 |
| 40 | 8  | 32 | ← | 40 | 9  | 31 | 1090.02585 | 0.00021  |
| 19 | 0  | 19 | ← | 20 | 1  | 20 | 1090.05347 | 0.00007  |
| 19 | 1  | 19 | ← | 20 | 0  | 20 | 1090.05347 | 0.00006  |
| 27 | 3  | 25 | ← | 27 | 4  | 24 | 1090.05826 | 0.00014  |
| 38 | 9  | 30 | ← | 38 | 10 | 29 | 1090.06855 | -0.00012 |
| 18 | 1  | 17 | ← | 19 | 2  | 18 | 1090.10485 | 0.00027  |

---

---

|    |    |    |   |    |    |    |            |          |
|----|----|----|---|----|----|----|------------|----------|
| 36 | 8  | 29 | ← | 36 | 9  | 28 | 1090.13123 | 0.00046  |
| 19 | 10 | 9  | ← | 19 | 11 | 8  | 1090.13742 | 0.00019  |
| 19 | 10 | 10 | ← | 19 | 11 | 9  | 1090.13742 | 0.00020  |
| 25 | 2  | 24 | ← | 25 | 3  | 23 | 1090.14648 | -0.00021 |
| 25 | 1  | 24 | ← | 25 | 2  | 23 | 1090.14648 | -0.00031 |
| 13 | 10 | 3  | ← | 13 | 11 | 2  | 1090.15590 | 0.00022  |
| 34 | 7  | 28 | ← | 34 | 8  | 27 | 1090.15590 | -0.00020 |
| 17 | 3  | 15 | ← | 18 | 2  | 16 | 1090.16088 | 0.00008  |
| 12 | 10 | 3  | ← | 12 | 11 | 2  | 1090.16093 | 0.00031  |
| 25 | 10 | 16 | ← | 25 | 11 | 15 | 1090.17188 | 0.00022  |
| 32 | 6  | 27 | ← | 32 | 7  | 26 | 1090.17188 | -0.00011 |
| 30 | 5  | 26 | ← | 30 | 6  | 25 | 1090.19656 | -0.00047 |
| 30 | 4  | 26 | ← | 30 | 5  | 25 | 1090.21565 | -0.00031 |
| 32 | 5  | 27 | ← | 32 | 6  | 26 | 1090.23225 | -0.00014 |
| 28 | 4  | 25 | ← | 28 | 5  | 24 | 1090.24048 | 0.00001  |
| 23 | 0  | 23 | ← | 23 | 1  | 22 | 1090.25385 | 0.00004  |
| 23 | 1  | 23 | ← | 23 | 2  | 22 | 1090.25385 | 0.00005  |
| 37 | 9  | 29 | ← | 37 | 10 | 28 | 1090.25872 | 0.00013  |
| 13 | 3  | 10 | ← | 14 | 4  | 11 | 1090.26085 | 0.00059  |
| 18 | 0  | 18 | ← | 19 | 1  | 19 | 1090.32221 | 0.00005  |
| 18 | 1  | 18 | ← | 19 | 0  | 19 | 1090.32221 | 0.00004  |
| 34 | 6  | 28 | ← | 34 | 7  | 27 | 1090.32221 | -0.00035 |
| 33 | 10 | 24 | ← | 33 | 11 | 23 | 1090.34747 | -0.00004 |
| 35 | 8  | 28 | ← | 35 | 9  | 27 | 1090.35680 | -0.00007 |
| 12 | 3  | 9  | ← | 13 | 4  | 10 | 1090.36446 | 0.00022  |
| 17 | 1  | 16 | ← | 18 | 2  | 17 | 1090.37103 | -0.00036 |
| 16 | 2  | 14 | ← | 17 | 3  | 15 | 1090.38216 | -0.00006 |
| 24 | 1  | 23 | ← | 24 | 2  | 22 | 1090.39083 | -0.00014 |
| 24 | 2  | 23 | ← | 24 | 3  | 22 | 1090.39083 | 0.00006  |
| 33 | 7  | 27 | ← | 33 | 8  | 26 | 1090.40271 | -0.00016 |
| 16 | 4  | 13 | ← | 17 | 3  | 14 | 1090.42374 | -0.00037 |
| 31 | 6  | 26 | ← | 31 | 7  | 25 | 1090.42637 | -0.00010 |
| 39 | 8  | 31 | ← | 39 | 9  | 30 | 1090.42948 | -0.00005 |
| 16 | 3  | 14 | ← | 17 | 2  | 15 | 1090.43707 | -0.00011 |
| 29 | 5  | 25 | ← | 29 | 6  | 24 | 1090.45117 | -0.00013 |
| 6  | 5  | 1  | ← | 7  | 6  | 2  | 1090.47204 | 0.00056  |
| 11 | 3  | 8  | ← | 12 | 4  | 9  | 1090.48056 | 0.00037  |
| 29 | 4  | 25 | ← | 29 | 5  | 24 | 1090.48366 | -0.00024 |
| 27 | 4  | 24 | ← | 27 | 5  | 23 | 1090.49089 | -0.00036 |
| 22 | 0  | 22 | ← | 22 | 1  | 21 | 1090.49613 | 0.00010  |
| 22 | 1  | 22 | ← | 22 | 2  | 21 | 1090.49613 | 0.00012  |
| 28 | 10 | 19 | ← | 29 | 9  | 20 | 1090.50910 | -0.00055 |
| 31 | 5  | 26 | ← | 31 | 6  | 25 | 1090.52513 | -0.00014 |

---

---

|    |    |    |   |    |    |    |            |          |
|----|----|----|---|----|----|----|------------|----------|
| 25 | 3  | 23 | ← | 25 | 4  | 22 | 1090.55195 | -0.00006 |
| 25 | 2  | 23 | ← | 25 | 3  | 22 | 1090.55422 | 0.00007  |
| 34 | 8  | 27 | ← | 34 | 9  | 26 | 1090.56310 | -0.00016 |
| 17 | 0  | 17 | ← | 18 | 1  | 18 | 1090.59046 | 0.00014  |
| 17 | 1  | 17 | ← | 18 | 0  | 18 | 1090.59046 | 0.00011  |
| 23 | 2  | 22 | ← | 23 | 3  | 21 | 1090.63438 | -0.00012 |
| 16 | 1  | 15 | ← | 17 | 2  | 16 | 1090.63752 | 0.00028  |
| 16 | 2  | 15 | ← | 17 | 1  | 16 | 1090.63979 | -0.00018 |
| 34 | 9  | 26 | ← | 34 | 10 | 25 | 1090.65806 | -0.00008 |
| 30 | 6  | 25 | ← | 30 | 7  | 24 | 1090.67566 | 0.00014  |
| 28 | 5  | 24 | ← | 28 | 6  | 23 | 1090.70388 | 0.00020  |
| 15 | 3  | 13 | ← | 16 | 2  | 14 | 1090.72097 | -0.00010 |
| 25 | 9  | 16 | ← | 25 | 10 | 15 | 1090.73816 | 0.00046  |
| 33 | 8  | 26 | ← | 33 | 9  | 25 | 1090.74570 | -0.00020 |
| 26 | 3  | 23 | ← | 26 | 4  | 22 | 1090.75756 | -0.00025 |
| 28 | 4  | 24 | ← | 28 | 5  | 23 | 1090.75897 | 0.00023  |
| 32 | 9  | 24 | ← | 32 | 10 | 23 | 1090.77936 | 0.00043  |
| 9  | 3  | 6  | ← | 10 | 4  | 7  | 1090.78783 | -0.00005 |
| 24 | 3  | 22 | ← | 24 | 4  | 21 | 1090.79875 | 0.00010  |
| 34 | 10 | 24 | ← | 34 | 11 | 23 | 1090.80838 | 0.00018  |
| 15 | 4  | 12 | ← | 16 | 3  | 13 | 1090.81699 | -0.00033 |
| 30 | 5  | 25 | ← | 30 | 6  | 24 | 1090.83291 | -0.00012 |
| 14 | 2  | 12 | ← | 15 | 3  | 13 | 1090.85302 | 0.00026  |
| 16 | 1  | 16 | ← | 17 | 0  | 17 | 1090.85791 | -0.00004 |
| 16 | 0  | 16 | ← | 17 | 1  | 17 | 1090.85791 | 0.00001  |
| 22 | 2  | 21 | ← | 22 | 3  | 20 | 1090.87815 | 0.00027  |
| 35 | 14 | 22 | ← | 36 | 13 | 23 | 1090.88690 | -0.00025 |
| 40 | 11 | 29 | ← | 40 | 12 | 28 | 1090.88953 | 0.00046  |
| 15 | 1  | 14 | ← | 16 | 2  | 15 | 1090.90152 | -0.00028 |
| 32 | 8  | 25 | ← | 32 | 9  | 24 | 1090.90152 | -0.00001 |
| 15 | 2  | 14 | ← | 16 | 1  | 15 | 1090.90712 | -0.00001 |
| 29 | 6  | 24 | ← | 29 | 7  | 23 | 1090.91640 | 0.00017  |
| 35 | 7  | 28 | ← | 35 | 8  | 27 | 1090.91640 | 0.00014  |
| 25 | 9  | 17 | ← | 26 | 8  | 18 | 1090.94415 | -0.00057 |
| 20 | 0  | 20 | ← | 20 | 1  | 19 | 1090.97916 | 0.00013  |
| 20 | 1  | 20 | ← | 20 | 2  | 19 | 1090.97916 | 0.00023  |
| 25 | 4  | 22 | ← | 25 | 5  | 21 | 1090.99053 | -0.00023 |
| 8  | 3  | 5  | ← | 9  | 4  | 6  | 1090.99314 | 0.00010  |
| 14 | 3  | 12 | ← | 15 | 2  | 13 | 1091.01718 | -0.00006 |
| 32 | 6  | 26 | ← | 32 | 7  | 25 | 1091.01771 | -0.00002 |
| 29 | 9  | 20 | ← | 29 | 10 | 19 | 1091.03825 | 0.00003  |
| 23 | 2  | 21 | ← | 23 | 3  | 20 | 1091.05198 | -0.00024 |
| 30 | 7  | 24 | ← | 30 | 8  | 23 | 1091.05661 | -0.00017 |

---

---

|    |   |    |   |    |   |    |            |          |
|----|---|----|---|----|---|----|------------|----------|
| 13 | 2 | 11 | ← | 14 | 3 | 12 | 1091.06181 | 0.00012  |
| 15 | 0 | 15 | ← | 16 | 1 | 16 | 1091.12495 | 0.00008  |
| 15 | 1 | 15 | ← | 16 | 0 | 16 | 1091.12495 | -0.00004 |
| 30 | 8 | 23 | ← | 30 | 9 | 22 | 1091.12495 | -0.00011 |
| 17 | 8 | 9  | ← | 17 | 9 | 8  | 1091.13214 | -0.00007 |
| 28 | 6 | 23 | ← | 28 | 7 | 22 | 1091.14519 | 0.00018  |
| 29 | 5 | 24 | ← | 29 | 6 | 23 | 1091.15941 | -0.00015 |
| 14 | 1 | 13 | ← | 15 | 2 | 14 | 1091.16454 | 0.00003  |
| 14 | 2 | 13 | ← | 15 | 1 | 14 | 1091.17520 | 0.00043  |
| 21 | 8 | 14 | ← | 21 | 9 | 13 | 1091.17989 | 0.00010  |
| 26 | 5 | 22 | ← | 26 | 6 | 21 | 1091.19563 | -0.00035 |
| 20 | 7 | 14 | ← | 21 | 6 | 15 | 1091.22037 | -0.00054 |
| 29 | 7 | 23 | ← | 29 | 8 | 22 | 1091.23243 | 0.00004  |
| 24 | 4 | 21 | ← | 24 | 5 | 20 | 1091.23786 | -0.00007 |
| 12 | 2 | 10 | ← | 13 | 3 | 11 | 1091.24766 | -0.00014 |
| 23 | 8 | 15 | ← | 23 | 9 | 14 | 1091.27923 | 0.00003  |
| 24 | 3 | 21 | ← | 24 | 4 | 20 | 1091.28656 | 0.00001  |
| 22 | 2 | 20 | ← | 22 | 3 | 19 | 1091.30349 | -0.00025 |
| 13 | 3 | 11 | ← | 14 | 2 | 12 | 1091.33164 | -0.00040 |
| 26 | 4 | 22 | ← | 26 | 5 | 21 | 1091.34199 | -0.00012 |
| 27 | 6 | 22 | ← | 27 | 7 | 21 | 1091.35752 | -0.00032 |
| 20 | 2 | 19 | ← | 20 | 3 | 18 | 1091.36348 | -0.00004 |
| 20 | 1 | 19 | ← | 20 | 2 | 18 | 1091.36614 | -0.00021 |
| 22 | 8 | 15 | ← | 23 | 7 | 16 | 1091.37600 | -0.00032 |
| 14 | 1 | 14 | ← | 15 | 0 | 15 | 1091.39166 | 0.00019  |
| 11 | 2 | 9  | ← | 12 | 3 | 10 | 1091.41180 | 0.00010  |
| 13 | 1 | 12 | ← | 14 | 2 | 13 | 1091.42426 | -0.00011 |
| 25 | 5 | 21 | ← | 25 | 6 | 20 | 1091.43057 | -0.00020 |
| 13 | 2 | 12 | ← | 14 | 1 | 13 | 1091.44392 | 0.00012  |
| 18 | 0 | 18 | ← | 18 | 1 | 17 | 1091.46015 | -0.00016 |
| 18 | 1 | 18 | ← | 18 | 2 | 17 | 1091.46015 | 0.00027  |
| 23 | 4 | 20 | ← | 23 | 5 | 19 | 1091.48137 | -0.00014 |
| 28 | 5 | 23 | ← | 28 | 6 | 22 | 1091.50671 | 0.00005  |
| 21 | 3 | 19 | ← | 21 | 4 | 18 | 1091.53460 | -0.00027 |
| 26 | 6 | 21 | ← | 26 | 7 | 20 | 1091.55054 | -0.00002 |
| 21 | 2 | 19 | ← | 21 | 3 | 18 | 1091.55868 | 0.00029  |
| 10 | 2 | 8  | ← | 11 | 3 | 9  | 1091.55944 | -0.00015 |
| 23 | 3 | 20 | ← | 23 | 4 | 19 | 1091.56260 | -0.00018 |
| 19 | 1 | 18 | ← | 19 | 2 | 17 | 1091.61094 | 0.00003  |
| 13 | 7 | 6  | ← | 13 | 8 | 5  | 1091.62017 | -0.00011 |
| 24 | 5 | 20 | ← | 24 | 6 | 19 | 1091.65335 | -0.00009 |
| 13 | 1 | 13 | ← | 14 | 0 | 14 | 1091.65766 | 0.00023  |
| 25 | 4 | 21 | ← | 25 | 5 | 20 | 1091.65766 | -0.00016 |

---

---

|    |   |    |   |    |    |    |            |          |
|----|---|----|---|----|----|----|------------|----------|
| 12 | 3 | 10 | ← | 13 | 2  | 11 | 1091.67236 | -0.00027 |
| 12 | 1 | 11 | ← | 13 | 2  | 12 | 1091.67976 | 0.00003  |
| 18 | 7 | 11 | ← | 18 | 8  | 10 | 1091.68706 | 0.00037  |
| 17 | 0 | 17 | ← | 17 | 1  | 16 | 1091.70056 | 0.00010  |
| 20 | 7 | 13 | ← | 20 | 8  | 12 | 1091.77713 | 0.00011  |
| 20 | 2 | 18 | ← | 20 | 3  | 17 | 1091.81783 | -0.00018 |
| 18 | 2 | 17 | ← | 18 | 3  | 16 | 1091.84706 | 0.00024  |
| 22 | 3 | 19 | ← | 22 | 4  | 18 | 1091.85161 | 0.00034  |
| 18 | 1 | 17 | ← | 18 | 2  | 16 | 1091.85661 | -0.00009 |
| 23 | 5 | 19 | ← | 23 | 6  | 18 | 1091.85970 | -0.00030 |
| 27 | 5 | 22 | ← | 27 | 6  | 21 | 1091.87089 | 0.00001  |
| 12 | 0 | 12 | ← | 13 | 1  | 13 | 1091.92165 | -0.00023 |
| 12 | 1 | 12 | ← | 13 | 0  | 13 | 1091.92273 | -0.00021 |
| 11 | 1 | 10 | ← | 12 | 2  | 11 | 1091.92809 | 0.00009  |
| 16 | 1 | 16 | ← | 16 | 2  | 15 | 1091.93889 | 0.00012  |
| 16 | 0 | 16 | ← | 16 | 1  | 15 | 1091.94085 | 0.00039  |
| 21 | 4 | 18 | ← | 21 | 5  | 17 | 1091.94853 | 0.00005  |
| 7  | 2 | 5  | ← | 8  | 3  | 6  | 1092.01236 | 0.00017  |
| 19 | 3 | 17 | ← | 19 | 4  | 16 | 1092.01542 | -0.00012 |
| 19 | 2 | 17 | ← | 19 | 3  | 16 | 1092.08523 | 0.00011  |
| 36 | 9 | 27 | ← | 36 | 10 | 26 | 1092.09274 | 0.00017  |
| 17 | 1 | 16 | ← | 17 | 2  | 15 | 1092.10468 | -0.00002 |
| 8  | 6 | 2  | ← | 8  | 7  | 1  | 1092.11637 | 0.00049  |
| 21 | 3 | 18 | ← | 21 | 4  | 17 | 1092.15542 | 0.00034  |
| 10 | 1 | 9  | ← | 11 | 2  | 10 | 1092.16547 | -0.00019 |
| 20 | 4 | 17 | ← | 20 | 5  | 16 | 1092.16547 | 0.00005  |
| 11 | 0 | 11 | ← | 12 | 1  | 12 | 1092.18602 | 0.00005  |
| 11 | 1 | 11 | ← | 12 | 0  | 12 | 1092.18797 | -0.00015 |
| 6  | 2 | 4  | ← | 7  | 3  | 5  | 1092.19774 | 0.00002  |
| 21 | 5 | 17 | ← | 21 | 6  | 16 | 1092.20875 | -0.00026 |
| 18 | 3 | 16 | ← | 18 | 4  | 15 | 1092.24810 | -0.00014 |
| 10 | 2 | 9  | ← | 11 | 1  | 10 | 1092.27983 | -0.00009 |
| 16 | 2 | 15 | ← | 16 | 3  | 14 | 1092.32431 | -0.00005 |
| 23 | 4 | 19 | ← | 23 | 5  | 18 | 1092.34013 | 0.00009  |
| 18 | 2 | 16 | ← | 18 | 3  | 15 | 1092.36263 | -0.00012 |
| 19 | 4 | 16 | ← | 19 | 5  | 15 | 1092.36612 | -0.00005 |
| 14 | 1 | 14 | ← | 14 | 2  | 13 | 1092.41468 | -0.00013 |
| 25 | 7 | 18 | ← | 25 | 8  | 17 | 1092.43111 | 0.00030  |
| 10 | 1 | 10 | ← | 11 | 0  | 11 | 1092.45335 | 0.00010  |
| 20 | 3 | 17 | ← | 20 | 4  | 16 | 1092.47467 | -0.00010 |
| 18 | 4 | 15 | ← | 18 | 5  | 14 | 1092.54644 | -0.00034 |
| 15 | 2 | 14 | ← | 15 | 3  | 13 | 1092.55855 | 0.00018  |
| 9  | 2 | 8  | ← | 10 | 1  | 9  | 1092.58106 | 0.00000  |

---

---

|    |   |    |   |    |   |    |            |          |
|----|---|----|---|----|---|----|------------|----------|
| 8  | 1 | 7  | ← | 9  | 2 | 8  | 1092.59543 | 0.00012  |
| 10 | 5 | 6  | ← | 10 | 6 | 5  | 1092.62523 | 0.00043  |
| 13 | 1 | 13 | ← | 13 | 2 | 12 | 1092.65091 | -0.00011 |
| 17 | 2 | 15 | ← | 17 | 3 | 14 | 1092.65351 | 0.00001  |
| 4  | 2 | 2  | ← | 5  | 3 | 3  | 1092.65608 | -0.00024 |
| 16 | 3 | 14 | ← | 16 | 4 | 13 | 1092.68390 | -0.00020 |
| 22 | 4 | 18 | ← | 22 | 5 | 17 | 1092.68984 | 0.00019  |
| 17 | 4 | 14 | ← | 17 | 5 | 13 | 1092.70359 | -0.00022 |
| 9  | 0 | 9  | ← | 10 | 1 | 10 | 1092.71019 | 0.00002  |
| 9  | 1 | 9  | ← | 10 | 0 | 10 | 1092.71883 | 0.00003  |
| 11 | 4 | 8  | ← | 12 | 3 | 9  | 1092.72704 | -0.00041 |
| 21 | 6 | 15 | ← | 21 | 7 | 14 | 1092.76947 | 0.00032  |
| 14 | 2 | 13 | ← | 14 | 3 | 12 | 1092.78672 | 0.00002  |
| 19 | 3 | 16 | ← | 19 | 4 | 15 | 1092.80515 | -0.00007 |
| 14 | 1 | 13 | ← | 14 | 2 | 12 | 1092.87985 | -0.00018 |
| 15 | 3 | 13 | ← | 15 | 4 | 12 | 1092.87985 | 0.00002  |
| 12 | 1 | 12 | ← | 12 | 2 | 11 | 1092.88509 | -0.00002 |
| 8  | 2 | 7  | ← | 9  | 1 | 8  | 1092.90269 | 0.00027  |
| 12 | 0 | 12 | ← | 12 | 1 | 11 | 1092.90698 | -0.00003 |
| 3  | 2 | 1  | ← | 4  | 3 | 2  | 1092.92928 | -0.00014 |
| 16 | 2 | 14 | ← | 16 | 3 | 13 | 1092.95747 | 0.00015  |
| 8  | 0 | 8  | ← | 9  | 1 | 9  | 1092.96892 | 0.00006  |
| 16 | 5 | 11 | ← | 16 | 6 | 10 | 1092.97979 | -0.00003 |
| 13 | 2 | 12 | ← | 13 | 3 | 11 | 1093.00647 | -0.00009 |
| 14 | 3 | 12 | ← | 14 | 4 | 11 | 1093.05532 | -0.00025 |
| 11 | 1 | 11 | ← | 11 | 2 | 10 | 1093.11567 | -0.00017 |
| 17 | 5 | 12 | ← | 17 | 6 | 11 | 1093.11567 | 0.00038  |
| 5  | 4 | 1  | ← | 5  | 5 | 0  | 1093.12049 | 0.00066  |
| 18 | 3 | 15 | ← | 18 | 4 | 14 | 1093.13338 | 0.00005  |
| 5  | 1 | 4  | ← | 6  | 2 | 5  | 1093.15654 | -0.00004 |
| 13 | 1 | 12 | ← | 13 | 2 | 11 | 1093.15654 | -0.00005 |
| 13 | 3 | 11 | ← | 13 | 4 | 10 | 1093.20782 | -0.00018 |
| 12 | 2 | 11 | ← | 12 | 3 | 10 | 1093.21474 | 0.00026  |
| 7  | 0 | 7  | ← | 8  | 1 | 8  | 1093.22334 | -0.00014 |
| 7  | 2 | 6  | ← | 8  | 1 | 7  | 1093.24832 | 0.00005  |
| 18 | 5 | 13 | ← | 18 | 6 | 12 | 1093.25152 | 0.00033  |
| 7  | 1 | 7  | ← | 8  | 0 | 8  | 1093.25530 | -0.00005 |
| 8  | 3 | 6  | ← | 9  | 2 | 7  | 1093.33463 | -0.00018 |
| 4  | 1 | 3  | ← | 5  | 2 | 4  | 1093.35390 | 0.00008  |
| 12 | 4 | 8  | ← | 12 | 5 | 7  | 1093.36086 | -0.00010 |
| 11 | 2 | 10 | ← | 11 | 3 | 9  | 1093.40665 | 0.00005  |
| 10 | 0 | 10 | ← | 10 | 1 | 9  | 1093.40901 | -0.00007 |
| 11 | 3 | 9  | ← | 11 | 4 | 8  | 1093.43512 | -0.00029 |

---

---

|    |    |    |   |    |    |    |            |          |
|----|----|----|---|----|----|----|------------|----------|
| 12 | 1  | 11 | ← | 12 | 2  | 10 | 1093.44282 | -0.00024 |
| 6  | 1  | 6  | ← | 7  | 0  | 7  | 1093.53041 | 0.00012  |
| 9  | 1  | 9  | ← | 9  | 2  | 8  | 1093.55879 | -0.00018 |
| 3  | 1  | 2  | ← | 4  | 2  | 3  | 1093.56889 | 0.00000  |
| 14 | 2  | 12 | ← | 14 | 3  | 11 | 1093.57359 | 0.00012  |
| 10 | 2  | 9  | ← | 10 | 3  | 8  | 1093.57917 | 0.00008  |
| 14 | 4  | 10 | ← | 14 | 5  | 9  | 1093.59043 | 0.00021  |
| 6  | 2  | 5  | ← | 7  | 1  | 6  | 1093.61827 | -0.00014 |
| 9  | 0  | 9  | ← | 9  | 1  | 8  | 1093.67059 | 0.00000  |
| 15 | 4  | 11 | ← | 15 | 5  | 10 | 1093.69184 | 0.00044  |
| 24 | 12 | 13 | ← | 25 | 11 | 14 | 1093.70550 | -0.00028 |
| 5  | 0  | 5  | ← | 6  | 1  | 6  | 1093.71177 | 0.00013  |
| 9  | 2  | 8  | ← | 9  | 3  | 7  | 1093.72847 | -0.00020 |
| 9  | 4  | 6  | ← | 10 | 3  | 7  | 1093.73150 | -0.00002 |
| 11 | 1  | 10 | ← | 11 | 2  | 9  | 1093.73310 | -0.00010 |
| 17 | 4  | 13 | ← | 17 | 5  | 12 | 1093.75411 | 0.00023  |
| 7  | 3  | 5  | ← | 8  | 2  | 6  | 1093.79185 | -0.00012 |
| 5  | 1  | 5  | ← | 6  | 0  | 6  | 1093.81407 | 0.00015  |
| 9  | 3  | 6  | ← | 9  | 4  | 5  | 1093.84607 | -0.00006 |
| 8  | 2  | 7  | ← | 8  | 3  | 6  | 1093.85335 | 0.00017  |
| 13 | 2  | 11 | ← | 13 | 3  | 10 | 1093.85335 | 0.00016  |
| 15 | 3  | 12 | ← | 15 | 4  | 11 | 1093.90061 | 0.00036  |
| 8  | 0  | 8  | ← | 8  | 1  | 7  | 1093.93862 | 0.00010  |
| 10 | 3  | 7  | ← | 10 | 4  | 6  | 1093.94160 | 0.00031  |
| 7  | 2  | 6  | ← | 7  | 3  | 5  | 1093.95172 | -0.00017 |
| 5  | 2  | 4  | ← | 6  | 1  | 5  | 1094.00646 | -0.00023 |
| 10 | 1  | 9  | ← | 10 | 2  | 8  | 1094.01371 | 0.00004  |
| 11 | 3  | 8  | ← | 11 | 4  | 7  | 1094.02780 | 0.00028  |
| 12 | 3  | 9  | ← | 12 | 4  | 8  | 1094.08320 | 0.00040  |
| 12 | 2  | 10 | ← | 12 | 3  | 9  | 1094.08825 | 0.00026  |
| 13 | 3  | 10 | ← | 13 | 4  | 9  | 1094.08825 | 0.00035  |
| 4  | 1  | 4  | ← | 5  | 0  | 5  | 1094.10980 | -0.00029 |
| 3  | 2  | 2  | ← | 3  | 3  | 1  | 1094.12728 | 0.00021  |
| 6  | 1  | 6  | ← | 6  | 2  | 5  | 1094.12990 | 0.00039  |
| 3  | 0  | 3  | ← | 4  | 1  | 4  | 1094.16672 | 0.00026  |
| 10 | 5  | 6  | ← | 11 | 4  | 7  | 1094.18837 | -0.00064 |
| 7  | 0  | 7  | ← | 7  | 1  | 6  | 1094.20626 | -0.00015 |
| 6  | 3  | 4  | ← | 7  | 2  | 5  | 1094.24328 | -0.00007 |
| 11 | 2  | 9  | ← | 11 | 3  | 8  | 1094.26420 | 0.00038  |
| 9  | 1  | 8  | ← | 9  | 2  | 7  | 1094.26668 | 0.00014  |
| 5  | 1  | 5  | ← | 5  | 2  | 4  | 1094.28018 | 0.00024  |
| 17 | 9  | 9  | ← | 18 | 8  | 10 | 1094.30062 | -0.00016 |
| 6  | 2  | 4  | ← | 6  | 3  | 3  | 1094.31108 | -0.00012 |

---

---

|    |    |    |   |    |    |    |            |          |
|----|----|----|---|----|----|----|------------|----------|
| 10 | 2  | 8  | ← | 10 | 3  | 7  | 1094.37581 | 0.00048  |
| 3  | 1  | 3  | ← | 4  | 0  | 4  | 1094.42121 | 0.00013  |
| 8  | 2  | 6  | ← | 8  | 3  | 5  | 1094.42121 | 0.00006  |
| 9  | 2  | 7  | ← | 9  | 3  | 6  | 1094.42539 | 0.00036  |
| 6  | 0  | 6  | ← | 6  | 1  | 5  | 1094.46160 | 0.00022  |
| 8  | 1  | 7  | ← | 8  | 2  | 6  | 1094.47527 | 0.00033  |
| 27 | 15 | 13 | ← | 28 | 14 | 14 | 1094.55488 | 0.00011  |
| 5  | 3  | 3  | ← | 6  | 2  | 4  | 1094.67829 | -0.00036 |
| 5  | 0  | 5  | ← | 5  | 1  | 4  | 1094.68714 | -0.00012 |
| 6  | 1  | 5  | ← | 6  | 2  | 4  | 1094.72642 | 0.00026  |
| 5  | 1  | 4  | ← | 5  | 2  | 3  | 1094.77260 | 0.00011  |
| 3  | 2  | 2  | ← | 4  | 1  | 3  | 1094.79749 | 0.00011  |
| 12 | 7  | 6  | ← | 13 | 6  | 7  | 1094.81556 | -0.00010 |
| 19 | 11 | 9  | ← | 20 | 10 | 10 | 1094.84094 | 0.00023  |
| 4  | 0  | 4  | ← | 4  | 1  | 3  | 1094.87042 | -0.00005 |
| 24 | 14 | 11 | ← | 25 | 13 | 12 | 1094.97130 | -0.00003 |
| 15 | 9  | 7  | ← | 16 | 8  | 8  | 1094.99632 | 0.00012  |
| 3  | 0  | 3  | ← | 3  | 1  | 2  | 1095.00520 | -0.00012 |
| 6  | 4  | 3  | ← | 7  | 3  | 4  | 1095.03490 | 0.00015  |
| 22 | 13 | 10 | ← | 23 | 12 | 11 | 1095.04022 | 0.00018  |
| 1  | 0  | 1  | ← | 1  | 1  | 0  | 1095.14812 | -0.00008 |
| 16 | 10 | 7  | ← | 17 | 9  | 8  | 1095.25894 | 0.00035  |
| 12 | 7  | 5  | ← | 11 | 8  | 4  | 1095.30589 | 0.00045  |
| 19 | 12 | 8  | ← | 20 | 11 | 9  | 1095.45191 | 0.00010  |
| 3  | 3  | 1  | ← | 4  | 2  | 2  | 1095.46932 | -0.00017 |
| 17 | 11 | 7  | ← | 18 | 10 | 8  | 1095.52265 | 0.00001  |
| 26 | 16 | 11 | ← | 27 | 15 | 12 | 1095.53434 | 0.00003  |
| 15 | 10 | 6  | ← | 16 | 9  | 7  | 1095.59534 | -0.00009 |
| 11 | 8  | 4  | ← | 12 | 7  | 5  | 1095.74642 | -0.00019 |
| 14 | 10 | 5  | ← | 15 | 9  | 6  | 1095.92839 | 0.00001  |
| 9  | 4  | 5  | ← | 8  | 5  | 4  | 1095.94122 | 0.00008  |
| 21 | 14 | 8  | ← | 22 | 13 | 9  | 1095.99654 | -0.00003 |
| 5  | 2  | 3  | ← | 5  | 1  | 4  | 1096.08599 | -0.00035 |
| 4  | 2  | 2  | ← | 4  | 1  | 3  | 1096.08920 | 0.00003  |
| 3  | 0  | 3  | ← | 2  | 1  | 2  | 1096.12005 | 0.00033  |
| 6  | 2  | 4  | ← | 6  | 1  | 5  | 1096.12511 | 0.00022  |
| 8  | 3  | 5  | ← | 7  | 4  | 4  | 1096.24700 | 0.00000  |
| 31 | 17 | 14 | ← | 30 | 18 | 13 | 1096.31911 | -0.00007 |
| 6  | 1  | 5  | ← | 6  | 0  | 6  | 1096.38482 | 0.00017  |
| 8  | 3  | 5  | ← | 8  | 2  | 6  | 1096.42513 | -0.00002 |
| 10 | 3  | 7  | ← | 10 | 2  | 8  | 1096.44565 | 0.00031  |
| 7  | 7  | 1  | ← | 8  | 6  | 2  | 1096.47027 | -0.00015 |
| 7  | 3  | 4  | ← | 7  | 2  | 5  | 1096.48116 | 0.00010  |

---

---

|    |    |    |   |    |    |    |            |          |
|----|----|----|---|----|----|----|------------|----------|
| 25 | 17 | 9  | ← | 26 | 16 | 10 | 1096.50288 | 0.00038  |
| 11 | 3  | 8  | ← | 11 | 2  | 9  | 1096.54418 | -0.00003 |
| 9  | 2  | 7  | ← | 9  | 1  | 8  | 1096.55937 | 0.00043  |
| 12 | 10 | 3  | ← | 13 | 9  | 4  | 1096.58403 | -0.00004 |
| 9  | 3  | 6  | ← | 8  | 4  | 5  | 1096.66909 | -0.00015 |
| 11 | 4  | 7  | ← | 10 | 5  | 6  | 1096.69306 | 0.00010  |
| 13 | 4  | 9  | ← | 13 | 3  | 10 | 1096.70419 | -0.00003 |
| 6  | 2  | 5  | ← | 6  | 1  | 6  | 1096.72460 | -0.00020 |
| 12 | 4  | 8  | ← | 12 | 3  | 9  | 1096.72770 | -0.00015 |
| 3  | 3  | 0  | ← | 3  | 2  | 1  | 1096.73593 | 0.00004  |
| 5  | 0  | 5  | ← | 4  | 1  | 4  | 1096.74534 | -0.00027 |
| 15 | 12 | 4  | ← | 16 | 11 | 5  | 1096.78351 | 0.00002  |
| 10 | 2  | 8  | ← | 10 | 1  | 9  | 1096.80311 | 0.00027  |
| 6  | 1  | 5  | ← | 5  | 2  | 4  | 1096.85040 | -0.00026 |
| 15 | 4  | 11 | ← | 15 | 3  | 12 | 1096.85740 | 0.00003  |
| 8  | 1  | 7  | ← | 8  | 0  | 8  | 1096.89373 | 0.00046  |
| 7  | 3  | 5  | ← | 7  | 2  | 6  | 1096.91207 | 0.00022  |
| 13 | 3  | 10 | ← | 13 | 2  | 11 | 1096.93124 | 0.00017  |
| 17 | 5  | 12 | ← | 17 | 4  | 13 | 1096.98052 | 0.00024  |
| 16 | 5  | 11 | ← | 16 | 4  | 12 | 1097.00559 | -0.00027 |
| 8  | 2  | 6  | ← | 7  | 3  | 5  | 1097.06291 | 0.00001  |
| 11 | 2  | 9  | ← | 11 | 1  | 10 | 1097.07426 | 0.00021  |
| 15 | 5  | 10 | ← | 15 | 4  | 11 | 1097.09133 | -0.00057 |
| 32 | 16 | 16 | ← | 31 | 17 | 15 | 1097.09594 | -0.00003 |
| 14 | 5  | 9  | ← | 13 | 6  | 8  | 1097.13459 | 0.00002  |
| 6  | 1  | 6  | ← | 5  | 0  | 5  | 1097.13801 | 0.00019  |
| 21 | 6  | 15 | ← | 21 | 5  | 16 | 1097.24096 | 0.00023  |
| 20 | 6  | 14 | ← | 20 | 5  | 15 | 1097.26389 | -0.00010 |
| 9  | 2  | 8  | ← | 9  | 1  | 9  | 1097.26927 | 0.00040  |
| 7  | 4  | 4  | ← | 7  | 3  | 5  | 1097.27770 | -0.00030 |
| 4  | 4  | 1  | ← | 4  | 3  | 2  | 1097.28997 | -0.00020 |
| 7  | 0  | 7  | ← | 6  | 1  | 6  | 1097.31277 | -0.00004 |
| 10 | 4  | 7  | ← | 10 | 3  | 8  | 1097.34599 | 0.00009  |
| 12 | 2  | 10 | ← | 12 | 1  | 11 | 1097.35485 | 0.00037  |
| 19 | 6  | 13 | ← | 19 | 5  | 14 | 1097.35735 | -0.00052 |
| 7  | 1  | 7  | ← | 6  | 0  | 6  | 1097.37096 | 0.00011  |
| 25 | 11 | 14 | ← | 24 | 12 | 13 | 1097.38919 | 0.00021  |
| 15 | 3  | 12 | ← | 15 | 2  | 13 | 1097.49305 | -0.00015 |
| 5  | 2  | 4  | ← | 4  | 1  | 3  | 1097.50977 | 0.00004  |
| 15 | 5  | 10 | ← | 14 | 6  | 9  | 1097.56123 | 0.00005  |
| 8  | 0  | 8  | ← | 7  | 1  | 7  | 1097.57976 | -0.00001 |
| 12 | 3  | 10 | ← | 12 | 2  | 11 | 1097.59359 | -0.00011 |
| 23 | 7  | 16 | ← | 23 | 6  | 17 | 1097.60240 | -0.00067 |

---

---

|    |   |    |   |    |    |    |            |          |
|----|---|----|---|----|----|----|------------|----------|
| 11 | 3 | 8  | ← | 10 | 4  | 7  | 1097.60500 | 0.00042  |
| 8  | 1 | 8  | ← | 7  | 0  | 7  | 1097.61150 | 0.00014  |
| 13 | 2 | 11 | ← | 13 | 1  | 12 | 1097.63068 | 0.00021  |
| 3  | 3 | 1  | ← | 2  | 2  | 0  | 1097.67052 | -0.00020 |
| 11 | 2 | 10 | ← | 11 | 1  | 11 | 1097.69006 | 0.00039  |
| 16 | 3 | 13 | ← | 16 | 2  | 14 | 1097.79309 | 0.00033  |
| 7  | 5 | 3  | ← | 7  | 4  | 4  | 1097.80949 | 0.00020  |
| 30 | 8 | 22 | ← | 30 | 7  | 23 | 1097.81755 | -0.00023 |
| 6  | 5 | 1  | ← | 6  | 4  | 2  | 1097.81992 | 0.00028  |
| 9  | 0 | 9  | ← | 8  | 1  | 8  | 1097.84025 | -0.00007 |
| 9  | 1 | 9  | ← | 8  | 0  | 8  | 1097.85683 | -0.00010 |
| 7  | 2 | 6  | ← | 6  | 1  | 5  | 1097.87894 | -0.00011 |
| 12 | 1 | 11 | ← | 12 | 0  | 12 | 1097.88460 | -0.00002 |
| 15 | 4 | 12 | ← | 15 | 3  | 13 | 1097.90244 | -0.00031 |
| 12 | 2 | 11 | ← | 12 | 1  | 12 | 1097.90777 | 0.00003  |
| 9  | 1 | 8  | ← | 8  | 2  | 7  | 1097.93270 | 0.00001  |
| 10 | 2 | 8  | ← | 9  | 3  | 7  | 1097.95018 | -0.00027 |
| 15 | 6 | 9  | ← | 15 | 5  | 10 | 1097.97854 | -0.00003 |
| 28 | 7 | 21 | ← | 28 | 6  | 22 | 1097.98913 | 0.00034  |
| 20 | 7 | 13 | ← | 19 | 8  | 12 | 1098.01642 | 0.00040  |
| 31 | 9 | 22 | ← | 31 | 8  | 23 | 1098.04054 | -0.00062 |
| 8  | 2 | 7  | ← | 7  | 1  | 6  | 1098.05487 | -0.00022 |
| 17 | 3 | 14 | ← | 17 | 2  | 15 | 1098.08438 | 0.00015  |
| 14 | 4 | 10 | ← | 13 | 5  | 9  | 1098.09450 | 0.00028  |
| 10 | 1 | 10 | ← | 9  | 0  | 9  | 1098.10557 | 0.00017  |
| 13 | 1 | 12 | ← | 13 | 0  | 13 | 1098.11527 | -0.00022 |
| 15 | 2 | 13 | ← | 15 | 1  | 14 | 1098.14852 | 0.00011  |
| 24 | 9 | 15 | ← | 23 | 10 | 14 | 1098.16988 | 0.00041  |
| 20 | 4 | 16 | ← | 20 | 3  | 17 | 1098.21437 | -0.00001 |
| 9  | 2 | 8  | ← | 8  | 1  | 7  | 1098.23846 | -0.00007 |
| 10 | 1 | 9  | ← | 9  | 2  | 8  | 1098.24521 | -0.00004 |
| 17 | 4 | 14 | ← | 17 | 3  | 15 | 1098.27709 | -0.00033 |
| 29 | 7 | 22 | ← | 29 | 6  | 23 | 1098.31041 | 0.00026  |
| 11 | 1 | 11 | ← | 10 | 0  | 10 | 1098.35504 | -0.00022 |
| 11 | 2 | 9  | ← | 10 | 3  | 8  | 1098.37365 | 0.00043  |
| 16 | 3 | 14 | ← | 16 | 2  | 15 | 1098.42557 | -0.00023 |
| 18 | 4 | 15 | ← | 18 | 3  | 16 | 1098.48396 | -0.00015 |
| 21 | 4 | 17 | ← | 21 | 3  | 18 | 1098.52010 | -0.00004 |
| 11 | 1 | 10 | ← | 10 | 2  | 9  | 1098.53649 | -0.00008 |
| 20 | 5 | 16 | ← | 20 | 4  | 17 | 1098.54658 | 0.00029  |
| 15 | 1 | 14 | ← | 15 | 0  | 15 | 1098.56768 | 0.00009  |
| 15 | 2 | 14 | ← | 15 | 1  | 15 | 1098.57108 | -0.00004 |
| 12 | 0 | 12 | ← | 11 | 1  | 11 | 1098.60377 | 0.00029  |

---

---

|    |   |    |   |    |   |    |            |          |
|----|---|----|---|----|---|----|------------|----------|
| 12 | 1 | 12 | ← | 11 | 0 | 11 | 1098.60549 | -0.00011 |
| 19 | 3 | 16 | ← | 19 | 2 | 17 | 1098.62342 | -0.00031 |
| 17 | 2 | 15 | ← | 17 | 1 | 16 | 1098.62708 | -0.00022 |
| 17 | 3 | 15 | ← | 17 | 2 | 16 | 1098.64681 | 0.00017  |
| 11 | 2 | 10 | ← | 10 | 1 | 9  | 1098.64977 | -0.00008 |
| 28 | 9 | 19 | ← | 28 | 8 | 20 | 1098.68587 | -0.00079 |
| 19 | 4 | 16 | ← | 19 | 3 | 17 | 1098.69852 | -0.00023 |
| 21 | 5 | 17 | ← | 21 | 4 | 18 | 1098.74279 | -0.00038 |
| 15 | 7 | 9  | ← | 15 | 6 | 10 | 1098.75983 | -0.00018 |
| 12 | 2 | 10 | ← | 11 | 3 | 9  | 1098.76797 | 0.00009  |
| 8  | 3 | 6  | ← | 7  | 2 | 5  | 1098.84242 | -0.00029 |
| 13 | 1 | 13 | ← | 12 | 0 | 12 | 1098.85556 | -0.00035 |
| 18 | 3 | 16 | ← | 18 | 2 | 17 | 1098.86855 | -0.00011 |
| 20 | 3 | 17 | ← | 20 | 2 | 18 | 1098.87370 | -0.00024 |
| 12 | 2 | 11 | ← | 11 | 1 | 10 | 1098.87668 | -0.00015 |
| 10 | 7 | 4  | ← | 10 | 6 | 5  | 1098.88913 | 0.00024  |
| 25 | 5 | 20 | ← | 25 | 4 | 21 | 1098.94180 | 0.00030  |
| 22 | 5 | 18 | ← | 22 | 4 | 19 | 1098.95150 | -0.00029 |
| 24 | 6 | 19 | ← | 24 | 5 | 20 | 1098.99050 | 0.00015  |
| 9  | 3 | 7  | ← | 8  | 2 | 6  | 1098.99482 | 0.00013  |
| 17 | 2 | 16 | ← | 17 | 1 | 17 | 1099.01355 | 0.00011  |
| 14 | 3 | 11 | ← | 13 | 4 | 10 | 1099.07521 | -0.00020 |
| 13 | 1 | 12 | ← | 12 | 2 | 11 | 1099.07731 | -0.00035 |
| 23 | 4 | 19 | ← | 23 | 3 | 20 | 1099.07982 | 0.00012  |
| 19 | 2 | 17 | ← | 19 | 1 | 18 | 1099.08478 | -0.00036 |
| 19 | 3 | 17 | ← | 19 | 2 | 18 | 1099.09109 | 0.00017  |
| 14 | 0 | 14 | ← | 13 | 1 | 13 | 1099.10580 | 0.00037  |
| 14 | 1 | 14 | ← | 13 | 0 | 13 | 1099.10580 | -0.00013 |
| 13 | 2 | 12 | ← | 12 | 1 | 11 | 1099.11298 | -0.00026 |
| 21 | 4 | 18 | ← | 21 | 3 | 19 | 1099.14039 | -0.00029 |
| 20 | 8 | 13 | ← | 20 | 7 | 14 | 1099.15374 | -0.00019 |
| 16 | 4 | 12 | ← | 15 | 5 | 11 | 1099.16397 | 0.00059  |
| 25 | 6 | 20 | ← | 25 | 5 | 21 | 1099.18942 | -0.00030 |
| 18 | 8 | 10 | ← | 18 | 7 | 11 | 1099.22128 | -0.00006 |
| 27 | 7 | 21 | ← | 27 | 6 | 22 | 1099.23068 | -0.00036 |
| 18 | 1 | 17 | ← | 18 | 0 | 18 | 1099.23328 | -0.00001 |
| 11 | 3 | 9  | ← | 10 | 2 | 8  | 1099.26178 | -0.00036 |
| 17 | 8 | 9  | ← | 17 | 7 | 10 | 1099.27416 | 0.00013  |
| 16 | 8 | 9  | ← | 16 | 7 | 10 | 1099.32075 | -0.00038 |
| 14 | 1 | 13 | ← | 13 | 2 | 12 | 1099.33653 | 0.00018  |
| 24 | 4 | 20 | ← | 24 | 3 | 21 | 1099.33654 | -0.00021 |
| 14 | 2 | 13 | ← | 13 | 1 | 12 | 1099.35547 | -0.00002 |
| 15 | 1 | 15 | ← | 14 | 0 | 14 | 1099.35547 | -0.00003 |

---

---

|    |    |    |   |    |    |    |            |          |
|----|----|----|---|----|----|----|------------|----------|
| 22 | 4  | 19 | ← | 22 | 3  | 20 | 1099.36376 | -0.00042 |
| 24 | 5  | 20 | ← | 24 | 4  | 21 | 1099.39019 | 0.00004  |
| 12 | 3  | 10 | ← | 11 | 2  | 9  | 1099.39887 | -0.00003 |
| 26 | 6  | 21 | ← | 26 | 5  | 22 | 1099.40067 | -0.00021 |
| 28 | 7  | 22 | ← | 28 | 6  | 23 | 1099.41736 | -0.00001 |
| 27 | 9  | 19 | ← | 27 | 8  | 20 | 1099.42757 | -0.00054 |
| 30 | 8  | 23 | ← | 30 | 7  | 24 | 1099.47024 | -0.00015 |
| 27 | 5  | 22 | ← | 27 | 4  | 23 | 1099.51978 | 0.00032  |
| 15 | 3  | 12 | ← | 14 | 4  | 11 | 1099.53177 | 0.00024  |
| 21 | 3  | 19 | ← | 21 | 2  | 20 | 1099.53411 | -0.00013 |
| 13 | 3  | 11 | ← | 12 | 2  | 10 | 1099.55181 | 0.00012  |
| 23 | 3  | 20 | ← | 23 | 2  | 21 | 1099.57978 | 0.00000  |
| 25 | 4  | 21 | ← | 25 | 3  | 22 | 1099.58297 | -0.00018 |
| 23 | 4  | 20 | ← | 23 | 3  | 21 | 1099.58781 | -0.00001 |
| 15 | 1  | 14 | ← | 14 | 2  | 13 | 1099.59117 | 0.00024  |
| 15 | 2  | 14 | ← | 14 | 1  | 13 | 1099.60095 | -0.00007 |
| 16 | 1  | 16 | ← | 15 | 0  | 15 | 1099.60453 | -0.00003 |
| 16 | 0  | 16 | ← | 15 | 1  | 15 | 1099.60453 | 0.00008  |
| 25 | 5  | 21 | ← | 25 | 4  | 22 | 1099.61425 | -0.00026 |
| 27 | 6  | 22 | ← | 27 | 5  | 23 | 1099.62000 | -0.00008 |
| 17 | 4  | 13 | ← | 16 | 5  | 12 | 1099.70028 | 0.00035  |
| 33 | 9  | 25 | ← | 33 | 8  | 26 | 1099.71286 | -0.00032 |
| 14 | 3  | 12 | ← | 13 | 2  | 11 | 1099.72665 | 0.00027  |
| 15 | 2  | 13 | ← | 14 | 3  | 12 | 1099.76062 | 0.00028  |
| 28 | 5  | 23 | ← | 28 | 4  | 24 | 1099.78306 | 0.00012  |
| 31 | 10 | 22 | ← | 31 | 9  | 23 | 1099.79765 | -0.00026 |
| 19 | 9  | 10 | ← | 19 | 8  | 11 | 1099.81077 | -0.00021 |
| 24 | 4  | 21 | ← | 24 | 3  | 22 | 1099.81077 | -0.00024 |
| 26 | 4  | 22 | ← | 26 | 3  | 23 | 1099.82215 | 0.00026  |
| 32 | 8  | 25 | ← | 32 | 7  | 26 | 1099.82907 | -0.00024 |
| 30 | 7  | 24 | ← | 30 | 6  | 25 | 1099.83350 | -0.00028 |
| 26 | 5  | 22 | ← | 26 | 4  | 23 | 1099.84024 | 0.00030  |
| 43 | 13 | 30 | ← | 43 | 12 | 31 | 1099.84024 | 0.00016  |
| 16 | 2  | 15 | ← | 15 | 1  | 14 | 1099.84807 | -0.00012 |
| 17 | 1  | 17 | ← | 16 | 0  | 16 | 1099.85308 | 0.00001  |
| 17 | 0  | 17 | ← | 16 | 1  | 16 | 1099.85308 | 0.00007  |
| 18 | 9  | 10 | ← | 18 | 8  | 11 | 1099.85308 | 0.00006  |
| 9  | 4  | 6  | ← | 8  | 3  | 5  | 1099.87823 | -0.00013 |
| 17 | 9  | 8  | ← | 17 | 8  | 9  | 1099.88599 | -0.00017 |
| 21 | 1  | 20 | ← | 21 | 0  | 21 | 1099.89035 | -0.00028 |
| 21 | 2  | 20 | ← | 21 | 1  | 21 | 1099.89035 | -0.00034 |
| 15 | 3  | 13 | ← | 14 | 2  | 12 | 1099.92271 | -0.00042 |
| 16 | 3  | 13 | ← | 15 | 4  | 12 | 1099.95180 | 0.00028  |

---

---

|    |    |    |   |    |    |    |            |          |
|----|----|----|---|----|----|----|------------|----------|
| 23 | 2  | 21 | ← | 23 | 1  | 22 | 1099.97436 | 0.00017  |
| 23 | 3  | 21 | ← | 23 | 2  | 22 | 1099.97436 | -0.00026 |
| 12 | 9  | 3  | ← | 12 | 8  | 4  | 1100.00037 | -0.00009 |
| 29 | 5  | 24 | ← | 29 | 4  | 25 | 1100.03452 | 0.00008  |
| 16 | 2  | 14 | ← | 15 | 3  | 13 | 1100.04281 | 0.00006  |
| 27 | 4  | 23 | ← | 27 | 3  | 24 | 1100.05539 | 0.00024  |
| 31 | 7  | 25 | ← | 31 | 6  | 26 | 1100.05539 | -0.00040 |
| 27 | 5  | 23 | ← | 27 | 4  | 24 | 1100.06502 | -0.00034 |
| 29 | 6  | 24 | ← | 29 | 5  | 25 | 1100.07084 | -0.00007 |
| 17 | 1  | 16 | ← | 16 | 2  | 15 | 1100.09342 | 0.00010  |
| 17 | 2  | 16 | ← | 16 | 1  | 15 | 1100.09584 | -0.00016 |
| 18 | 1  | 18 | ← | 17 | 0  | 17 | 1100.10101 | 0.00001  |
| 18 | 0  | 18 | ← | 17 | 1  | 17 | 1100.10101 | 0.00003  |
| 22 | 1  | 21 | ← | 22 | 0  | 22 | 1100.10827 | -0.00001 |
| 22 | 2  | 21 | ← | 22 | 1  | 22 | 1100.10827 | -0.00004 |
| 16 | 3  | 14 | ← | 15 | 2  | 13 | 1100.13778 | -0.00023 |
| 25 | 10 | 16 | ← | 25 | 9  | 17 | 1100.14279 | -0.00056 |
| 24 | 3  | 22 | ← | 24 | 2  | 23 | 1100.19353 | -0.00004 |
| 24 | 2  | 22 | ← | 24 | 1  | 23 | 1100.19353 | 0.00018  |
| 24 | 10 | 15 | ← | 24 | 9  | 16 | 1100.20192 | 0.00007  |
| 6  | 6  | 1  | ← | 5  | 5  | 0  | 1100.21490 | 0.00043  |
| 11 | 4  | 8  | ← | 10 | 3  | 7  | 1100.22303 | -0.00005 |
| 36 | 9  | 28 | ← | 36 | 8  | 29 | 1100.22776 | 0.00018  |
| 38 | 10 | 29 | ← | 38 | 9  | 30 | 1100.23934 | 0.00008  |
| 23 | 10 | 13 | ← | 23 | 9  | 14 | 1100.24928 | 0.00008  |
| 30 | 5  | 25 | ← | 30 | 4  | 26 | 1100.27708 | -0.00014 |
| 32 | 7  | 26 | ← | 32 | 6  | 27 | 1100.28240 | -0.00018 |
| 28 | 4  | 24 | ← | 28 | 3  | 25 | 1100.28450 | 0.00005  |
| 28 | 5  | 24 | ← | 28 | 4  | 25 | 1100.28999 | -0.00015 |
| 17 | 2  | 15 | ← | 16 | 3  | 14 | 1100.31173 | 0.00004  |
| 40 | 11 | 30 | ← | 40 | 10 | 31 | 1100.32086 | -0.00051 |
| 23 | 2  | 22 | ← | 23 | 1  | 23 | 1100.32526 | 0.00001  |
| 23 | 1  | 22 | ← | 23 | 0  | 23 | 1100.32526 | 0.00002  |
| 17 | 3  | 14 | ← | 16 | 4  | 13 | 1100.33157 | 0.00042  |
| 18 | 1  | 17 | ← | 17 | 2  | 16 | 1100.34287 | 0.00032  |
| 19 | 1  | 19 | ← | 18 | 0  | 18 | 1100.34837 | 0.00001  |
| 19 | 0  | 19 | ← | 18 | 1  | 18 | 1100.34837 | 0.00002  |
| 17 | 3  | 15 | ← | 16 | 2  | 14 | 1100.36556 | -0.00027 |
| 39 | 10 | 30 | ← | 39 | 9  | 31 | 1100.41613 | 0.00006  |
| 37 | 9  | 29 | ← | 37 | 8  | 30 | 1100.43669 | 0.00000  |
| 41 | 11 | 31 | ← | 41 | 10 | 32 | 1100.44870 | -0.00007 |
| 40 | 12 | 29 | ← | 40 | 11 | 30 | 1100.46600 | 0.00004  |
| 27 | 3  | 24 | ← | 27 | 2  | 25 | 1100.47465 | 0.00004  |

---

---

|    |    |    |   |    |    |    |            |          |
|----|----|----|---|----|----|----|------------|----------|
| 33 | 7  | 27 | ← | 33 | 6  | 28 | 1100.51144 | -0.00034 |
| 29 | 5  | 25 | ← | 29 | 4  | 26 | 1100.51409 | 0.00017  |
| 25 | 7  | 18 | ← | 24 | 8  | 17 | 1100.52290 | 0.00044  |
| 31 | 6  | 26 | ← | 31 | 5  | 27 | 1100.52596 | 0.00003  |
| 9  | 5  | 5  | ← | 8  | 4  | 4  | 1100.54794 | -0.00023 |
| 18 | 2  | 16 | ← | 17 | 3  | 15 | 1100.57189 | -0.00003 |
| 12 | 10 | 3  | ← | 12 | 9  | 4  | 1100.57646 | 0.00015  |
| 19 | 1  | 18 | ← | 18 | 2  | 17 | 1100.59111 | 0.00021  |
| 20 | 0  | 20 | ← | 19 | 1  | 19 | 1100.59513 | 0.00000  |
| 20 | 1  | 20 | ← | 19 | 0  | 19 | 1100.59513 | 0.00000  |
| 18 | 3  | 16 | ← | 17 | 2  | 15 | 1100.60173 | -0.00024 |
| 36 | 12 | 24 | ← | 35 | 13 | 23 | 1100.61382 | 0.00013  |
| 15 | 4  | 12 | ← | 14 | 3  | 11 | 1100.62304 | -0.00042 |
| 26 | 3  | 24 | ← | 26 | 2  | 25 | 1100.62870 | -0.00030 |
| 26 | 2  | 24 | ← | 26 | 1  | 25 | 1100.62870 | -0.00024 |
| 36 | 7  | 29 | ← | 36 | 6  | 30 | 1100.63301 | 0.00019  |
| 18 | 3  | 15 | ← | 17 | 4  | 14 | 1100.67276 | -0.00004 |
| 28 | 4  | 25 | ← | 28 | 3  | 26 | 1100.69443 | -0.00026 |
| 28 | 3  | 25 | ← | 28 | 2  | 26 | 1100.69443 | 0.00009  |
| 40 | 13 | 27 | ← | 40 | 12 | 28 | 1100.70627 | 0.00000  |
| 36 | 8  | 29 | ← | 36 | 7  | 30 | 1100.70627 | -0.00045 |
| 34 | 6  | 28 | ← | 34 | 5  | 29 | 1100.71765 | 0.00015  |
| 16 | 4  | 13 | ← | 15 | 3  | 12 | 1100.72576 | -0.00039 |
| 30 | 5  | 26 | ← | 30 | 4  | 27 | 1100.73644 | -0.00010 |
| 34 | 7  | 28 | ← | 34 | 6  | 29 | 1100.74164 | -0.00006 |
| 34 | 12 | 22 | ← | 34 | 11 | 23 | 1100.75247 | -0.00002 |
| 32 | 6  | 27 | ← | 32 | 5  | 28 | 1100.75247 | -0.00003 |
| 43 | 11 | 33 | ← | 43 | 10 | 34 | 1100.78569 | -0.00015 |
| 19 | 2  | 17 | ← | 18 | 3  | 16 | 1100.82633 | -0.00036 |
| 20 | 1  | 19 | ← | 19 | 2  | 18 | 1100.83844 | -0.00008 |
| 21 | 1  | 21 | ← | 20 | 0  | 20 | 1100.84152 | 0.00020  |
| 21 | 0  | 21 | ← | 20 | 1  | 20 | 1100.84152 | 0.00020  |
| 27 | 2  | 25 | ← | 27 | 1  | 26 | 1100.84534 | -0.00015 |
| 27 | 3  | 25 | ← | 27 | 2  | 26 | 1100.84534 | -0.00018 |
| 23 | 11 | 12 | ← | 23 | 10 | 13 | 1100.88375 | -0.00011 |
| 39 | 9  | 31 | ← | 39 | 8  | 32 | 1100.88549 | 0.00022  |
| 39 | 13 | 26 | ← | 39 | 12 | 27 | 1100.91195 | -0.00054 |
| 22 | 11 | 12 | ← | 22 | 10 | 13 | 1100.92430 | -0.00004 |
| 37 | 8  | 30 | ← | 37 | 7  | 31 | 1100.93866 | 0.00016  |
| 31 | 5  | 27 | ← | 31 | 4  | 28 | 1100.95756 | -0.00036 |
| 26 | 1  | 25 | ← | 26 | 0  | 26 | 1100.97199 | -0.00015 |
| 26 | 2  | 25 | ← | 26 | 1  | 26 | 1100.97199 | -0.00015 |
| 33 | 5  | 28 | ← | 33 | 4  | 29 | 1100.97379 | -0.00019 |

---

---

|    |    |    |   |    |    |    |            |          |
|----|----|----|---|----|----|----|------------|----------|
| 33 | 6  | 28 | ← | 33 | 5  | 29 | 1100.97809 | 0.00024  |
| 19 | 3  | 16 | ← | 18 | 4  | 15 | 1100.98332 | 0.00002  |
| 44 | 11 | 34 | ← | 44 | 10 | 35 | 1100.98715 | 0.00019  |
| 40 | 13 | 28 | ← | 40 | 12 | 29 | 1101.01640 | -0.00016 |
| 40 | 8  | 32 | ← | 40 | 7  | 33 | 1101.03904 | 0.00014  |
| 28 | 2  | 26 | ← | 28 | 1  | 27 | 1101.06150 | 0.00024  |
| 28 | 3  | 26 | ← | 28 | 2  | 27 | 1101.06150 | 0.00023  |
| 20 | 2  | 18 | ← | 19 | 3  | 17 | 1101.07802 | -0.00005 |
| 21 | 1  | 20 | ← | 20 | 2  | 19 | 1101.08523 | -0.00026 |
| 22 | 0  | 22 | ← | 21 | 1  | 21 | 1101.08667 | -0.00024 |
| 22 | 1  | 22 | ← | 21 | 0  | 21 | 1101.08667 | -0.00024 |
| 40 | 9  | 32 | ← | 40 | 8  | 33 | 1101.11786 | 0.00016  |
| 30 | 4  | 27 | ← | 30 | 3  | 28 | 1101.13040 | -0.00013 |
| 30 | 3  | 27 | ← | 30 | 2  | 28 | 1101.13040 | -0.00004 |
| 30 | 12 | 18 | ← | 30 | 11 | 19 | 1101.14275 | -0.00018 |
| 30 | 12 | 19 | ← | 30 | 11 | 20 | 1101.15012 | -0.00034 |
| 38 | 8  | 31 | ← | 38 | 7  | 32 | 1101.17084 | 0.00006  |
| 32 | 5  | 28 | ← | 32 | 4  | 29 | 1101.17803 | -0.00006 |
| 27 | 2  | 26 | ← | 27 | 1  | 27 | 1101.18651 | 0.00003  |
| 27 | 1  | 26 | ← | 27 | 0  | 27 | 1101.18651 | 0.00003  |
| 19 | 4  | 16 | ← | 18 | 3  | 15 | 1101.18925 | -0.00025 |
| 43 | 14 | 29 | ← | 43 | 13 | 30 | 1101.19998 | 0.00034  |
| 36 | 7  | 30 | ← | 36 | 6  | 31 | 1101.19998 | 0.00030  |
| 45 | 11 | 35 | ← | 45 | 10 | 36 | 1101.20342 | -0.00002 |
| 20 | 3  | 17 | ← | 19 | 4  | 16 | 1101.27077 | 0.00004  |
| 28 | 12 | 17 | ← | 28 | 11 | 18 | 1101.27369 | -0.00031 |
| 29 | 3  | 27 | ← | 29 | 2  | 28 | 1101.27642 | 0.00014  |
| 29 | 2  | 27 | ← | 29 | 1  | 28 | 1101.27642 | 0.00015  |
| 50 | 13 | 38 | ← | 50 | 12 | 39 | 1101.30222 | 0.00003  |
| 21 | 2  | 19 | ← | 20 | 3  | 18 | 1101.32714 | -0.00015 |
| 21 | 3  | 19 | ← | 20 | 2  | 18 | 1101.33173 | -0.00018 |
| 22 | 1  | 21 | ← | 21 | 2  | 20 | 1101.33185 | 0.00001  |
| 22 | 2  | 21 | ← | 21 | 1  | 20 | 1101.33197 | 0.00005  |
| 23 | 0  | 23 | ← | 22 | 1  | 22 | 1101.33197 | 0.00005  |
| 23 | 1  | 23 | ← | 22 | 0  | 22 | 1101.33197 | 0.00005  |
| 31 | 3  | 28 | ← | 31 | 2  | 29 | 1101.34691 | -0.00008 |
| 31 | 4  | 28 | ← | 31 | 3  | 29 | 1101.34691 | -0.00013 |
| 41 | 9  | 33 | ← | 41 | 8  | 34 | 1101.35243 | 0.00034  |
| 39 | 7  | 32 | ← | 39 | 6  | 33 | 1101.38670 | -0.00004 |
| 20 | 4  | 17 | ← | 19 | 3  | 16 | 1101.39343 | -0.00024 |
| 33 | 5  | 29 | ← | 33 | 4  | 30 | 1101.39700 | -0.00007 |
| 33 | 4  | 29 | ← | 33 | 3  | 30 | 1101.39700 | 0.00018  |
| 39 | 8  | 32 | ← | 39 | 7  | 33 | 1101.40225 | -0.00021 |

---

---

|    |    |    |   |    |    |    |            |          |
|----|----|----|---|----|----|----|------------|----------|
| 37 | 7  | 31 | ← | 37 | 6  | 32 | 1101.42653 | -0.00017 |
| 24 | 12 | 13 | ← | 24 | 11 | 14 | 1101.46316 | 0.00003  |
| 13 | 5  | 9  | ← | 12 | 4  | 8  | 1101.49321 | -0.00014 |
| 21 | 4  | 17 | ← | 20 | 5  | 16 | 1101.53623 | 0.00013  |
| 21 | 3  | 18 | ← | 20 | 4  | 17 | 1101.54191 | -0.00039 |
| 32 | 4  | 29 | ← | 32 | 3  | 30 | 1101.56304 | 0.00039  |
| 32 | 3  | 29 | ← | 32 | 2  | 30 | 1101.56304 | 0.00041  |
| 21 | 12 | 9  | ← | 21 | 11 | 10 | 1101.56537 | 0.00045  |
| 49 | 12 | 38 | ← | 49 | 11 | 39 | 1101.56970 | -0.00005 |
| 22 | 2  | 20 | ← | 21 | 3  | 19 | 1101.57510 | 0.00000  |
| 24 | 0  | 24 | ← | 23 | 1  | 23 | 1101.57650 | 0.00016  |
| 24 | 1  | 24 | ← | 23 | 0  | 23 | 1101.57650 | 0.00016  |
| 22 | 3  | 20 | ← | 21 | 2  | 19 | 1101.57738 | -0.00012 |
| 23 | 2  | 22 | ← | 22 | 1  | 21 | 1101.57738 | -0.00025 |
| 23 | 1  | 22 | ← | 22 | 2  | 21 | 1101.57738 | -0.00021 |
| 42 | 9  | 34 | ← | 42 | 8  | 35 | 1101.58701 | 0.00025  |
| 21 | 4  | 18 | ← | 20 | 3  | 17 | 1101.61382 | 0.00018  |
| 40 | 7  | 33 | ← | 40 | 6  | 34 | 1101.62347 | -0.00027 |
| 36 | 6  | 31 | ← | 36 | 5  | 32 | 1101.64548 | 0.00002  |
| 38 | 6  | 32 | ← | 38 | 5  | 33 | 1101.64954 | -0.00003 |
| 17 | 12 | 6  | ← | 17 | 11 | 7  | 1101.66189 | 0.00024  |
| 16 | 12 | 4  | ← | 16 | 11 | 5  | 1101.68034 | 0.00006  |
| 45 | 9  | 36 | ← | 45 | 8  | 37 | 1101.70261 | 0.00029  |
| 31 | 3  | 29 | ← | 31 | 2  | 30 | 1101.70403 | -0.00008 |
| 31 | 2  | 29 | ← | 31 | 1  | 30 | 1101.70403 | -0.00008 |
| 45 | 10 | 36 | ← | 45 | 9  | 37 | 1101.75336 | 0.00003  |
| 22 | 3  | 19 | ← | 21 | 4  | 18 | 1101.80351 | 0.00000  |
| 43 | 8  | 35 | ← | 43 | 7  | 36 | 1101.80351 | 0.00010  |
| 25 | 1  | 25 | ← | 24 | 0  | 24 | 1101.82038 | 0.00022  |
| 25 | 0  | 25 | ← | 24 | 1  | 24 | 1101.82038 | 0.00022  |
| 43 | 9  | 35 | ← | 43 | 8  | 36 | 1101.82043 | -0.00016 |
| 24 | 1  | 23 | ← | 23 | 2  | 22 | 1101.82262 | -0.00013 |
| 24 | 2  | 23 | ← | 23 | 1  | 22 | 1101.82262 | -0.00015 |
| 35 | 5  | 31 | ← | 35 | 4  | 32 | 1101.83186 | 0.00018  |
| 35 | 4  | 31 | ← | 35 | 3  | 32 | 1101.83186 | 0.00025  |
| 22 | 4  | 19 | ← | 21 | 3  | 18 | 1101.84387 | -0.00013 |
| 41 | 7  | 34 | ← | 41 | 6  | 35 | 1101.85617 | -0.00020 |
| 41 | 8  | 34 | ← | 41 | 7  | 35 | 1101.86184 | 0.00025  |
| 37 | 5  | 32 | ← | 37 | 4  | 33 | 1101.86465 | -0.00021 |
| 17 | 5  | 13 | ← | 16 | 4  | 12 | 1101.86724 | -0.00058 |
| 39 | 6  | 33 | ← | 39 | 5  | 34 | 1101.87478 | 0.00029  |
| 22 | 4  | 18 | ← | 21 | 5  | 17 | 1101.88737 | -0.00028 |
| 51 | 11 | 40 | ← | 51 | 10 | 41 | 1101.89717 | -0.00046 |

---

---

|    |    |    |   |    |    |    |            |          |
|----|----|----|---|----|----|----|------------|----------|
| 48 | 11 | 38 | ← | 48 | 10 | 39 | 1101.90285 | -0.00040 |
| 32 | 2  | 30 | ← | 32 | 1  | 31 | 1101.91713 | 0.00017  |
| 32 | 3  | 30 | ← | 32 | 2  | 31 | 1101.91713 | 0.00017  |
| 19 | 5  | 15 | ← | 18 | 4  | 14 | 1101.96443 | -0.00034 |
| 34 | 3  | 31 | ← | 34 | 2  | 32 | 1101.99141 | 0.00011  |
| 34 | 4  | 31 | ← | 34 | 3  | 32 | 1101.99141 | 0.00010  |
| 51 | 12 | 40 | ← | 51 | 11 | 41 | 1102.03782 | -0.00019 |
| 44 | 8  | 36 | ← | 44 | 7  | 37 | 1102.04296 | 0.00009  |
| 36 | 5  | 32 | ← | 36 | 4  | 33 | 1102.04728 | -0.00012 |
| 36 | 4  | 32 | ← | 36 | 3  | 33 | 1102.04728 | -0.00008 |
| 44 | 9  | 36 | ← | 44 | 8  | 37 | 1102.05266 | -0.00026 |
| 23 | 3  | 20 | ← | 22 | 4  | 19 | 1102.05796 | -0.00019 |
| 26 | 0  | 26 | ← | 25 | 1  | 25 | 1102.06341 | 0.00002  |
| 26 | 1  | 26 | ← | 25 | 0  | 25 | 1102.06341 | 0.00002  |
| 25 | 2  | 24 | ← | 24 | 1  | 23 | 1102.06745 | 0.00012  |
| 25 | 1  | 24 | ← | 24 | 2  | 23 | 1102.06745 | 0.00013  |
| 24 | 2  | 22 | ← | 23 | 3  | 21 | 1102.06792 | 0.00007  |
| 24 | 3  | 22 | ← | 23 | 2  | 21 | 1102.06845 | -0.00003 |
| 23 | 4  | 20 | ← | 22 | 3  | 19 | 1102.08090 | 0.00020  |
| 38 | 6  | 33 | ← | 38 | 5  | 34 | 1102.08367 | 0.00004  |
| 38 | 5  | 33 | ← | 38 | 4  | 34 | 1102.08367 | 0.00022  |
| 36 | 14 | 22 | ← | 36 | 13 | 23 | 1102.08604 | 0.00001  |
| 42 | 8  | 35 | ← | 42 | 7  | 36 | 1102.08874 | 0.00022  |
| 33 | 2  | 31 | ← | 33 | 1  | 32 | 1102.12941 | 0.00029  |
| 33 | 3  | 31 | ← | 33 | 2  | 32 | 1102.12941 | 0.00029  |
| 21 | 5  | 17 | ← | 20 | 4  | 16 | 1102.14110 | 0.00005  |
| 35 | 14 | 21 | ← | 35 | 13 | 22 | 1102.16127 | -0.00033 |
| 23 | 4  | 19 | ← | 22 | 5  | 18 | 1102.20465 | 0.00015  |
| 47 | 9  | 38 | ← | 47 | 8  | 39 | 1102.20811 | 0.00023  |
| 37 | 4  | 33 | ← | 37 | 3  | 34 | 1102.26234 | 0.00023  |
| 37 | 5  | 33 | ← | 37 | 4  | 34 | 1102.26234 | 0.00022  |
| 22 | 5  | 18 | ← | 21 | 4  | 17 | 1102.27843 | -0.00039 |
| 14 | 13 | 1  | ← | 14 | 12 | 2  | 1102.30113 | 0.00086  |
| 39 | 6  | 34 | ← | 39 | 5  | 35 | 1102.30113 | 0.00032  |
| 39 | 5  | 34 | ← | 39 | 4  | 35 | 1102.30113 | 0.00042  |
| 27 | 0  | 27 | ← | 26 | 1  | 26 | 1102.30599 | -0.00004 |
| 27 | 1  | 27 | ← | 26 | 0  | 26 | 1102.30599 | -0.00004 |
| 26 | 2  | 25 | ← | 25 | 1  | 24 | 1102.31145 | 0.00015  |
| 26 | 1  | 25 | ← | 25 | 2  | 24 | 1102.31145 | 0.00015  |
| 25 | 2  | 23 | ← | 24 | 3  | 22 | 1102.31309 | -0.00005 |
| 41 | 7  | 35 | ← | 41 | 6  | 36 | 1102.31894 | 0.00027  |
| 24 | 4  | 21 | ← | 23 | 3  | 20 | 1102.32086 | -0.00019 |
| 24 | 5  | 19 | ← | 23 | 6  | 18 | 1102.33676 | 0.00041  |

---

---

|    |    |    |   |    |    |    |            |          |
|----|----|----|---|----|----|----|------------|----------|
| 34 | 3  | 32 | ← | 34 | 2  | 33 | 1102.34064 | 0.00005  |
| 34 | 2  | 32 | ← | 34 | 1  | 33 | 1102.34064 | 0.00005  |
| 50 | 11 | 40 | ← | 50 | 10 | 41 | 1102.38182 | -0.00036 |
| 33 | 2  | 32 | ← | 33 | 1  | 33 | 1102.45942 | 0.00018  |
| 33 | 1  | 32 | ← | 33 | 0  | 33 | 1102.45942 | 0.00018  |
| 46 | 8  | 38 | ← | 46 | 7  | 39 | 1102.50843 | -0.00006 |
| 40 | 5  | 35 | ← | 40 | 4  | 36 | 1102.51707 | 0.00031  |
| 40 | 6  | 35 | ← | 40 | 5  | 36 | 1102.51707 | 0.00026  |
| 53 | 12 | 42 | ← | 53 | 11 | 43 | 1102.52067 | -0.00039 |
| 10 | 8  | 3  | ← | 9  | 7  | 2  | 1102.52862 | 0.00059  |
| 44 | 8  | 37 | ← | 44 | 7  | 38 | 1102.53675 | -0.00011 |
| 28 | 0  | 28 | ← | 27 | 1  | 27 | 1102.54797 | -0.00011 |
| 28 | 1  | 28 | ← | 27 | 0  | 27 | 1102.54797 | -0.00011 |
| 27 | 2  | 26 | ← | 26 | 1  | 25 | 1102.55447 | -0.00022 |
| 27 | 1  | 26 | ← | 26 | 2  | 25 | 1102.55447 | -0.00022 |
| 26 | 3  | 24 | ← | 25 | 2  | 23 | 1102.55779 | -0.00017 |
| 26 | 2  | 24 | ← | 25 | 3  | 23 | 1102.55779 | -0.00001 |
| 25 | 4  | 22 | ← | 24 | 3  | 21 | 1102.56313 | -0.00020 |
| 37 | 4  | 34 | ← | 37 | 3  | 35 | 1102.62829 | 0.00005  |
| 37 | 3  | 34 | ← | 37 | 2  | 35 | 1102.62829 | 0.00005  |
| 38 | 15 | 23 | ← | 38 | 14 | 24 | 1102.63304 | 0.00026  |
| 24 | 5  | 20 | ← | 23 | 4  | 19 | 1102.64286 | -0.00013 |
| 34 | 1  | 33 | ← | 34 | 0  | 34 | 1102.66918 | -0.00001 |
| 34 | 2  | 33 | ← | 34 | 1  | 34 | 1102.66918 | -0.00001 |
| 37 | 15 | 23 | ← | 37 | 14 | 24 | 1102.70651 | -0.00009 |
| 41 | 6  | 36 | ← | 41 | 5  | 37 | 1102.73176 | 0.00008  |
| 41 | 5  | 36 | ← | 41 | 4  | 37 | 1102.73176 | 0.00011  |
| 47 | 8  | 39 | ← | 47 | 7  | 40 | 1102.73595 | -0.00037 |
| 43 | 7  | 37 | ← | 43 | 6  | 38 | 1102.75536 | -0.00014 |
| 43 | 6  | 37 | ← | 43 | 5  | 38 | 1102.75536 | -0.00001 |
| 54 | 12 | 43 | ← | 54 | 11 | 44 | 1102.76240 | -0.00029 |
| 25 | 4  | 21 | ← | 24 | 5  | 20 | 1102.76906 | 0.00000  |
| 29 | 0  | 29 | ← | 28 | 1  | 28 | 1102.78943 | -0.00011 |
| 29 | 1  | 29 | ← | 28 | 0  | 28 | 1102.78943 | -0.00011 |
| 28 | 2  | 27 | ← | 27 | 1  | 26 | 1102.79733 | -0.00016 |
| 28 | 1  | 27 | ← | 27 | 2  | 26 | 1102.79733 | -0.00015 |
| 27 | 2  | 25 | ← | 26 | 3  | 24 | 1102.80196 | 0.00011  |
| 27 | 3  | 25 | ← | 26 | 2  | 24 | 1102.80196 | 0.00003  |
| 26 | 3  | 23 | ← | 25 | 4  | 22 | 1102.80269 | -0.00024 |
| 26 | 4  | 23 | ← | 25 | 3  | 22 | 1102.80632 | -0.00018 |
| 13 | 7  | 7  | ← | 12 | 6  | 6  | 1102.84872 | -0.00003 |
| 25 | 5  | 21 | ← | 24 | 4  | 20 | 1102.85577 | -0.00013 |
| 31 | 8  | 23 | ← | 30 | 9  | 22 | 1102.90817 | 0.00072  |

---

---

|    |    |    |   |    |   |    |            |          |
|----|----|----|---|----|---|----|------------|----------|
| 16 | 6  | 11 | ← | 15 | 5 | 10 | 1102.92902 | -0.00012 |
| 42 | 5  | 37 | ← | 42 | 4 | 38 | 1102.94557 | 0.00011  |
| 42 | 6  | 37 | ← | 42 | 5 | 38 | 1102.94557 | 0.00010  |
| 46 | 7  | 39 | ← | 46 | 6 | 40 | 1102.97779 | -0.00019 |
| 30 | 0  | 30 | ← | 29 | 1 | 29 | 1103.03037 | -0.00003 |
| 30 | 1  | 30 | ← | 29 | 0 | 29 | 1103.03037 | -0.00003 |
| 26 | 4  | 22 | ← | 25 | 5 | 21 | 1103.03037 | -0.00039 |
| 29 | 2  | 28 | ← | 28 | 1 | 27 | 1103.03966 | -0.00003 |
| 29 | 1  | 28 | ← | 28 | 2 | 27 | 1103.03966 | -0.00003 |
| 28 | 2  | 26 | ← | 27 | 3 | 25 | 1103.04524 | -0.00008 |
| 28 | 3  | 26 | ← | 27 | 2 | 25 | 1103.04524 | -0.00012 |
| 27 | 3  | 24 | ← | 26 | 4 | 23 | 1103.04798 | -0.00007 |
| 27 | 4  | 24 | ← | 26 | 3 | 23 | 1103.04984 | -0.00010 |
| 27 | 6  | 21 | ← | 26 | 7 | 20 | 1103.06171 | 0.00012  |
| 10 | 9  | 2  | ← | 9  | 8 | 1  | 1103.09303 | 0.00043  |
| 26 | 5  | 21 | ← | 25 | 6 | 20 | 1103.10154 | 0.00003  |
| 41 | 4  | 37 | ← | 41 | 3 | 38 | 1103.11188 | 0.00006  |
| 41 | 5  | 37 | ← | 41 | 4 | 38 | 1103.11188 | 0.00006  |
| 51 | 10 | 42 | ← | 51 | 9 | 43 | 1103.15004 | -0.00032 |
| 43 | 6  | 38 | ← | 43 | 5 | 39 | 1103.15827 | 0.00004  |
| 43 | 5  | 38 | ← | 43 | 4 | 39 | 1103.15827 | 0.00004  |
| 45 | 7  | 39 | ← | 45 | 6 | 40 | 1103.18678 | -0.00022 |
| 45 | 6  | 39 | ← | 45 | 5 | 40 | 1103.18678 | -0.00018 |
| 19 | 6  | 14 | ← | 18 | 5 | 13 | 1103.23028 | -0.00048 |
| 20 | 6  | 15 | ← | 19 | 5 | 14 | 1103.25579 | -0.00029 |
| 21 | 6  | 16 | ← | 20 | 5 | 15 | 1103.26295 | -0.00058 |
| 31 | 0  | 31 | ← | 30 | 1 | 30 | 1103.27044 | -0.00023 |
| 31 | 1  | 31 | ← | 30 | 0 | 30 | 1103.27044 | -0.00023 |
| 30 | 2  | 29 | ← | 29 | 1 | 28 | 1103.28129 | -0.00001 |
| 30 | 1  | 29 | ← | 29 | 2 | 28 | 1103.28129 | -0.00001 |
| 30 | 2  | 29 | ← | 29 | 1 | 28 | 1103.28129 | -0.00001 |
| 27 | 4  | 23 | ← | 26 | 5 | 22 | 1103.28490 | -0.00008 |
| 27 | 4  | 23 | ← | 26 | 5 | 22 | 1103.28490 | -0.00008 |
| 29 | 2  | 27 | ← | 28 | 3 | 26 | 1103.28803 | -0.00017 |
| 29 | 3  | 27 | ← | 28 | 2 | 26 | 1103.28803 | -0.00019 |
| 28 | 3  | 25 | ← | 27 | 4 | 24 | 1103.29264 | 0.00034  |
| 28 | 3  | 25 | ← | 27 | 4 | 24 | 1103.29264 | 0.00034  |
| 27 | 5  | 23 | ← | 26 | 4 | 22 | 1103.31300 | -0.00040 |
| 42 | 5  | 38 | ← | 42 | 4 | 39 | 1103.32224 | 0.00015  |
| 42 | 4  | 38 | ← | 42 | 3 | 39 | 1103.32224 | 0.00015  |
| 24 | 6  | 19 | ← | 23 | 5 | 18 | 1103.33347 | -0.00034 |
| 44 | 5  | 39 | ← | 44 | 4 | 40 | 1103.36988 | -0.00013 |
| 44 | 6  | 39 | ← | 44 | 5 | 40 | 1103.36988 | -0.00013 |

---

---

|    |    |    |   |    |    |    |            |          |
|----|----|----|---|----|----|----|------------|----------|
| 25 | 6  | 20 | ← | 24 | 5  | 19 | 1103.41732 | -0.00012 |
| 27 | 5  | 22 | ← | 26 | 6  | 21 | 1103.42361 | 0.00047  |
| 41 | 4  | 38 | ← | 41 | 3  | 39 | 1103.46710 | 0.00018  |
| 41 | 3  | 38 | ← | 41 | 2  | 39 | 1103.46710 | 0.00018  |
| 35 | 16 | 20 | ← | 35 | 15 | 21 | 1103.49344 | 0.00037  |
| 38 | 1  | 37 | ← | 38 | 0  | 38 | 1103.50291 | 0.00013  |
| 38 | 2  | 37 | ← | 38 | 1  | 38 | 1103.50291 | 0.00013  |
| 32 | 1  | 32 | ← | 31 | 0  | 31 | 1103.51027 | -0.00007 |
| 32 | 0  | 32 | ← | 31 | 1  | 31 | 1103.51027 | -0.00007 |
| 31 | 2  | 30 | ← | 30 | 1  | 29 | 1103.52237 | 0.00005  |
| 31 | 1  | 30 | ← | 30 | 2  | 29 | 1103.52237 | 0.00005  |
| 30 | 2  | 28 | ← | 29 | 3  | 27 | 1103.53060 | 0.00010  |
| 30 | 3  | 28 | ← | 29 | 2  | 27 | 1103.53060 | 0.00009  |
| 28 | 4  | 24 | ← | 27 | 5  | 23 | 1103.53428 | -0.00023 |
| 29 | 3  | 26 | ← | 28 | 4  | 25 | 1103.53592 | 0.00009  |
| 28 | 5  | 24 | ← | 27 | 4  | 23 | 1103.55024 | -0.00013 |
| 45 | 6  | 40 | ← | 45 | 5  | 41 | 1103.58058 | -0.00025 |
| 45 | 5  | 40 | ← | 45 | 4  | 41 | 1103.58058 | -0.00024 |
| 12 | 9  | 4  | ← | 11 | 8  | 3  | 1103.68766 | -0.00016 |
| 14 | 8  | 7  | ← | 13 | 7  | 6  | 1103.70882 | -0.00013 |
| 33 | 1  | 33 | ← | 32 | 0  | 32 | 1103.74931 | -0.00011 |
| 33 | 0  | 33 | ← | 32 | 1  | 32 | 1103.74931 | -0.00011 |
| 32 | 2  | 31 | ← | 31 | 1  | 30 | 1103.76280 | 0.00006  |
| 32 | 1  | 31 | ← | 31 | 2  | 30 | 1103.76280 | 0.00006  |
| 31 | 2  | 29 | ← | 30 | 3  | 28 | 1103.77227 | 0.00006  |
| 31 | 3  | 29 | ← | 30 | 2  | 28 | 1103.77227 | 0.00006  |
| 30 | 4  | 27 | ← | 29 | 3  | 26 | 1103.77884 | -0.00015 |
| 30 | 3  | 27 | ← | 29 | 4  | 26 | 1103.77884 | 0.00011  |
| 29 | 4  | 25 | ← | 28 | 5  | 24 | 1103.78137 | 0.00029  |
| 29 | 5  | 25 | ← | 28 | 4  | 24 | 1103.78965 | -0.00017 |
| 43 | 4  | 40 | ← | 43 | 3  | 41 | 1103.88177 | -0.00019 |
| 43 | 3  | 40 | ← | 43 | 2  | 41 | 1103.88177 | -0.00019 |
| 28 | 6  | 23 | ← | 27 | 5  | 22 | 1103.88507 | -0.00039 |
| 34 | 0  | 34 | ← | 33 | 1  | 33 | 1103.98785 | -0.00006 |
| 34 | 1  | 34 | ← | 33 | 0  | 33 | 1103.98785 | -0.00006 |
| 29 | 5  | 24 | ← | 28 | 6  | 23 | 1103.99192 | 0.00040  |
| 33 | 2  | 32 | ← | 32 | 1  | 31 | 1104.00262 | 0.00005  |
| 33 | 1  | 32 | ← | 32 | 2  | 31 | 1104.00262 | 0.00005  |
| 32 | 2  | 30 | ← | 31 | 3  | 29 | 1104.01354 | 0.00021  |
| 32 | 3  | 30 | ← | 31 | 2  | 29 | 1104.01354 | 0.00021  |
| 31 | 4  | 28 | ← | 30 | 3  | 27 | 1104.02107 | -0.00008 |
| 31 | 3  | 28 | ← | 30 | 4  | 27 | 1104.02107 | 0.00005  |
| 30 | 4  | 26 | ← | 29 | 5  | 25 | 1104.02587 | 0.00010  |

---

---

|    |    |    |   |    |    |    |            |          |
|----|----|----|---|----|----|----|------------|----------|
| 30 | 5  | 26 | ← | 29 | 4  | 25 | 1104.03080 | 0.00028  |
| 37 | 17 | 20 | ← | 37 | 16 | 21 | 1104.03880 | 0.00038  |
| 29 | 6  | 24 | ← | 28 | 5  | 23 | 1104.09228 | 0.00024  |
| 41 | 1  | 40 | ← | 41 | 0  | 41 | 1104.12129 | -0.00023 |
| 41 | 2  | 40 | ← | 41 | 1  | 41 | 1104.12129 | -0.00023 |
| 43 | 3  | 41 | ← | 43 | 2  | 42 | 1104.21385 | -0.00016 |
| 43 | 2  | 41 | ← | 43 | 1  | 42 | 1104.21385 | -0.00016 |
| 35 | 1  | 35 | ← | 34 | 0  | 34 | 1104.22556 | -0.00023 |
| 35 | 0  | 35 | ← | 34 | 1  | 34 | 1104.22556 | -0.00023 |
| 34 | 1  | 33 | ← | 33 | 2  | 32 | 1104.24200 | 0.00020  |
| 34 | 2  | 33 | ← | 33 | 1  | 32 | 1104.24200 | 0.00020  |
| 33 | 2  | 31 | ← | 32 | 3  | 30 | 1104.25388 | 0.00002  |
| 33 | 3  | 31 | ← | 32 | 2  | 30 | 1104.25388 | 0.00002  |
| 32 | 3  | 29 | ← | 31 | 4  | 28 | 1104.26283 | 0.00010  |
| 32 | 4  | 29 | ← | 31 | 3  | 28 | 1104.26283 | 0.00004  |
| 31 | 4  | 27 | ← | 30 | 5  | 26 | 1104.26911 | -0.00005 |
| 31 | 5  | 27 | ← | 30 | 4  | 26 | 1104.27158 | -0.00014 |
| 30 | 6  | 24 | ← | 29 | 7  | 23 | 1104.31360 | 0.00017  |
| 27 | 17 | 10 | ← | 27 | 16 | 11 | 1104.44424 | 0.00069  |
| 36 | 0  | 36 | ← | 35 | 1  | 35 | 1104.46294 | -0.00015 |
| 36 | 1  | 36 | ← | 35 | 0  | 35 | 1104.46294 | -0.00015 |
| 35 | 1  | 34 | ← | 34 | 2  | 33 | 1104.48058 | 0.00015  |
| 35 | 2  | 34 | ← | 34 | 1  | 33 | 1104.48058 | 0.00015  |
| 34 | 3  | 32 | ← | 33 | 2  | 31 | 1104.49400 | 0.00020  |
| 34 | 2  | 32 | ← | 33 | 3  | 31 | 1104.49400 | 0.00020  |
| 33 | 4  | 30 | ← | 32 | 3  | 29 | 1104.50397 | 0.00008  |
| 33 | 3  | 30 | ← | 32 | 4  | 29 | 1104.50397 | 0.00011  |
| 31 | 5  | 26 | ← | 30 | 6  | 25 | 1104.50695 | 0.00012  |
| 32 | 5  | 28 | ← | 31 | 4  | 27 | 1104.51262 | -0.00037 |
| 26 | 7  | 20 | ← | 25 | 6  | 19 | 1104.60299 | -0.00035 |
| 20 | 17 | 3  | ← | 20 | 16 | 4  | 1104.60858 | 0.00017  |
| 28 | 7  | 22 | ← | 27 | 6  | 21 | 1104.61512 | -0.00036 |
| 25 | 7  | 19 | ← | 24 | 6  | 18 | 1104.63402 | -0.00079 |
| 31 | 6  | 25 | ← | 30 | 7  | 24 | 1104.63864 | 0.00010  |
| 29 | 7  | 23 | ← | 28 | 6  | 22 | 1104.68186 | -0.00009 |
| 23 | 7  | 17 | ← | 22 | 6  | 16 | 1104.68889 | -0.00047 |
| 37 | 0  | 37 | ← | 36 | 1  | 36 | 1104.69965 | -0.00014 |
| 37 | 1  | 37 | ← | 36 | 0  | 36 | 1104.69965 | -0.00014 |
| 36 | 2  | 35 | ← | 35 | 1  | 34 | 1104.71856 | 0.00010  |
| 36 | 1  | 35 | ← | 35 | 2  | 34 | 1104.71856 | 0.00010  |
| 35 | 3  | 33 | ← | 34 | 2  | 32 | 1104.73326 | 0.00012  |
| 35 | 2  | 33 | ← | 34 | 3  | 32 | 1104.73326 | 0.00012  |
| 34 | 4  | 31 | ← | 33 | 3  | 30 | 1104.74465 | 0.00022  |

---

---

|    |    |    |   |    |    |    |            |          |
|----|----|----|---|----|----|----|------------|----------|
| 34 | 3  | 31 | ← | 33 | 4  | 30 | 1104.74465 | 0.00024  |
| 33 | 4  | 29 | ← | 32 | 5  | 28 | 1104.75334 | 0.00000  |
| 33 | 5  | 29 | ← | 32 | 4  | 28 | 1104.75405 | -0.00001 |
| 32 | 5  | 27 | ← | 31 | 6  | 26 | 1104.75517 | -0.00002 |
| 32 | 6  | 27 | ← | 31 | 5  | 26 | 1104.77455 | 0.00020  |
| 30 | 7  | 24 | ← | 29 | 6  | 23 | 1104.79224 | -0.00016 |
| 18 | 8  | 11 | ← | 17 | 7  | 10 | 1104.84444 | -0.00016 |
| 14 | 10 | 5  | ← | 13 | 9  | 4  | 1104.85014 | 0.00056  |
| 38 | 0  | 38 | ← | 37 | 1  | 37 | 1104.93581 | -0.00008 |
| 38 | 1  | 38 | ← | 37 | 0  | 37 | 1104.93581 | -0.00008 |
| 31 | 7  | 25 | ← | 30 | 6  | 24 | 1104.94146 | 0.00001  |
| 37 | 1  | 36 | ← | 36 | 2  | 35 | 1104.95604 | 0.00014  |
| 37 | 2  | 36 | ← | 36 | 1  | 35 | 1104.95604 | 0.00014  |
| 36 | 2  | 34 | ← | 35 | 3  | 33 | 1104.97218 | 0.00029  |
| 36 | 3  | 34 | ← | 35 | 2  | 33 | 1104.97218 | 0.00029  |
| 35 | 4  | 32 | ← | 34 | 3  | 31 | 1104.98466 | 0.00027  |
| 35 | 3  | 32 | ← | 34 | 4  | 31 | 1104.98466 | 0.00028  |
| 34 | 5  | 30 | ← | 33 | 4  | 29 | 1104.99477 | -0.00002 |
| 33 | 5  | 28 | ← | 32 | 6  | 27 | 1105.00005 | -0.00024 |
| 28 | 18 | 10 | ← | 28 | 17 | 11 | 1105.03668 | 0.00071  |
| 32 | 7  | 26 | ← | 31 | 6  | 25 | 1105.12083 | 0.00011  |
| 39 | 1  | 39 | ← | 38 | 0  | 38 | 1105.17126 | -0.00014 |
| 39 | 0  | 39 | ← | 38 | 1  | 38 | 1105.17126 | -0.00014 |
| 38 | 2  | 37 | ← | 37 | 1  | 36 | 1105.19298 | 0.00024  |
| 38 | 1  | 37 | ← | 37 | 2  | 36 | 1105.19298 | 0.00024  |
| 37 | 3  | 35 | ← | 36 | 2  | 34 | 1105.21025 | 0.00020  |
| 37 | 2  | 35 | ← | 36 | 3  | 34 | 1105.21025 | 0.00020  |
| 36 | 3  | 33 | ← | 35 | 4  | 32 | 1105.22405 | 0.00028  |
| 36 | 4  | 33 | ← | 35 | 3  | 32 | 1105.22405 | 0.00027  |
| 35 | 5  | 31 | ← | 34 | 4  | 30 | 1105.23522 | 0.00015  |
| 35 | 4  | 31 | ← | 34 | 5  | 30 | 1105.23522 | 0.00034  |
| 34 | 5  | 29 | ← | 33 | 6  | 28 | 1105.24339 | 0.00009  |
| 34 | 6  | 29 | ← | 33 | 5  | 28 | 1105.24951 | 0.00029  |
| 33 | 7  | 27 | ← | 32 | 6  | 26 | 1105.32167 | 0.00001  |
| 40 | 0  | 40 | ← | 39 | 1  | 39 | 1105.40627 | -0.00003 |
| 40 | 1  | 40 | ← | 39 | 0  | 39 | 1105.40627 | -0.00003 |
| 12 | 12 | 1  | ← | 11 | 11 | 0  | 1105.41186 | 0.00046  |
| 14 | 11 | 4  | ← | 13 | 10 | 3  | 1105.42455 | -0.00021 |
| 39 | 2  | 38 | ← | 38 | 1  | 37 | 1105.42918 | 0.00021  |
| 39 | 1  | 38 | ← | 38 | 2  | 37 | 1105.42918 | 0.00021  |
| 38 | 3  | 36 | ← | 37 | 2  | 35 | 1105.44792 | 0.00032  |
| 38 | 2  | 36 | ← | 37 | 3  | 35 | 1105.44792 | 0.00032  |
| 37 | 4  | 34 | ← | 36 | 3  | 33 | 1105.46288 | 0.00030  |

---

---

|    |    |    |   |    |    |    |            |          |
|----|----|----|---|----|----|----|------------|----------|
| 37 | 3  | 34 | ← | 36 | 4  | 33 | 1105.46288 | 0.00030  |
| 34 | 6  | 28 | ← | 33 | 7  | 27 | 1105.47088 | 0.00015  |
| 34 | 6  | 28 | ← | 33 | 7  | 27 | 1105.47088 | 0.00015  |
| 36 | 5  | 32 | ← | 35 | 4  | 31 | 1105.47499 | 0.00012  |
| 36 | 4  | 32 | ← | 35 | 5  | 31 | 1105.47499 | 0.00022  |
| 35 | 5  | 30 | ← | 34 | 6  | 29 | 1105.48523 | 0.00031  |
| 35 | 6  | 30 | ← | 34 | 5  | 29 | 1105.48786 | -0.00030 |
| 34 | 7  | 27 | ← | 33 | 8  | 26 | 1105.52318 | 0.00055  |
| 34 | 7  | 28 | ← | 33 | 6  | 27 | 1105.53743 | 0.00025  |
| 41 | 0  | 41 | ← | 40 | 1  | 40 | 1105.64051 | -0.00011 |
| 41 | 1  | 41 | ← | 40 | 0  | 40 | 1105.64051 | -0.00011 |
| 40 | 1  | 39 | ← | 39 | 2  | 38 | 1105.66470 | 0.00009  |
| 40 | 2  | 39 | ← | 39 | 1  | 38 | 1105.66470 | 0.00009  |
| 39 | 2  | 37 | ← | 38 | 3  | 36 | 1105.68487 | 0.00031  |
| 39 | 3  | 37 | ← | 38 | 2  | 36 | 1105.68487 | 0.00031  |
| 38 | 3  | 35 | ← | 37 | 4  | 34 | 1105.70108 | 0.00029  |
| 38 | 4  | 35 | ← | 37 | 3  | 34 | 1105.70108 | 0.00029  |
| 37 | 5  | 33 | ← | 36 | 4  | 32 | 1105.71438 | 0.00023  |
| 37 | 4  | 33 | ← | 36 | 5  | 32 | 1105.71438 | 0.00028  |
| 35 | 6  | 29 | ← | 34 | 7  | 28 | 1105.72331 | -0.00007 |
| 25 | 19 | 6  | ← | 25 | 18 | 7  | 1105.73885 | 0.00051  |
| 35 | 7  | 29 | ← | 34 | 6  | 28 | 1105.76219 | 0.00015  |
| 40 | 20 | 20 | ← | 40 | 19 | 21 | 1105.84340 | -0.00029 |
| 42 | 0  | 42 | ← | 41 | 1  | 41 | 1105.87421 | -0.00012 |
| 42 | 1  | 42 | ← | 41 | 0  | 41 | 1105.87421 | -0.00012 |
| 32 | 8  | 25 | ← | 31 | 7  | 24 | 1105.88298 | -0.00017 |
| 41 | 1  | 40 | ← | 40 | 2  | 39 | 1105.89968 | 0.00003  |
| 41 | 2  | 40 | ← | 40 | 1  | 39 | 1105.89968 | 0.00003  |
| 30 | 8  | 23 | ← | 29 | 7  | 22 | 1105.91783 | -0.00024 |
| 40 | 2  | 38 | ← | 39 | 3  | 37 | 1105.92127 | 0.00036  |
| 40 | 3  | 38 | ← | 39 | 2  | 37 | 1105.92127 | 0.00036  |
| 33 | 8  | 26 | ← | 32 | 7  | 25 | 1105.93506 | 0.00019  |
| 39 | 4  | 36 | ← | 38 | 3  | 35 | 1105.93873 | 0.00031  |
| 39 | 3  | 36 | ← | 38 | 4  | 35 | 1105.93873 | 0.00032  |
| 38 | 4  | 34 | ← | 37 | 5  | 33 | 1105.95325 | 0.00040  |
| 38 | 5  | 34 | ← | 37 | 4  | 33 | 1105.95325 | 0.00037  |
| 36 | 6  | 30 | ← | 35 | 7  | 29 | 1105.97017 | -0.00026 |
| 36 | 7  | 30 | ← | 35 | 6  | 29 | 1105.99291 | 0.00030  |
| 16 | 11 | 6  | ← | 15 | 10 | 5  | 1106.01343 | 0.00012  |
| 34 | 8  | 27 | ← | 33 | 7  | 26 | 1106.03415 | -0.00040 |
| 43 | 1  | 43 | ← | 42 | 0  | 42 | 1106.10734 | -0.00011 |
| 43 | 0  | 43 | ← | 42 | 1  | 42 | 1106.10734 | -0.00011 |
| 27 | 8  | 20 | ← | 26 | 7  | 19 | 1106.12005 | -0.00040 |

---

---

|    |    |    |   |    |    |    |            |          |
|----|----|----|---|----|----|----|------------|----------|
| 42 | 1  | 41 | ← | 41 | 2  | 40 | 1106.13410 | 0.00001  |
| 42 | 2  | 41 | ← | 41 | 1  | 40 | 1106.13410 | 0.00001  |
| 36 | 7  | 29 | ← | 35 | 8  | 28 | 1106.14650 | -0.00023 |
| 41 | 3  | 39 | ← | 40 | 2  | 38 | 1106.15668 | 0.00002  |
| 41 | 2  | 39 | ← | 40 | 3  | 38 | 1106.15668 | 0.00002  |
| 40 | 3  | 37 | ← | 39 | 4  | 36 | 1106.17568 | 0.00024  |
| 40 | 4  | 37 | ← | 39 | 3  | 36 | 1106.17568 | 0.00024  |
| 39 | 5  | 35 | ← | 38 | 4  | 34 | 1106.19121 | 0.00016  |
| 39 | 4  | 35 | ← | 38 | 5  | 34 | 1106.19121 | 0.00017  |
| 38 | 5  | 33 | ← | 37 | 6  | 32 | 1106.20499 | 0.00039  |
| 37 | 6  | 31 | ← | 36 | 7  | 30 | 1106.21403 | 0.00006  |
| 37 | 7  | 31 | ← | 36 | 6  | 30 | 1106.22668 | 0.00016  |
| 44 | 1  | 44 | ← | 43 | 0  | 43 | 1106.33988 | -0.00009 |
| 44 | 0  | 44 | ← | 43 | 1  | 43 | 1106.33988 | -0.00009 |
| 36 | 8  | 29 | ← | 35 | 7  | 28 | 1106.34878 | 0.00024  |
| 43 | 2  | 42 | ← | 42 | 1  | 41 | 1106.36760 | -0.00032 |
| 43 | 1  | 42 | ← | 42 | 2  | 41 | 1106.36760 | -0.00032 |
| 42 | 3  | 40 | ← | 41 | 2  | 39 | 1106.39171 | -0.00010 |
| 42 | 2  | 40 | ← | 41 | 3  | 39 | 1106.39171 | -0.00010 |
| 23 | 20 | 3  | ← | 23 | 19 | 4  | 1106.40708 | 0.00021  |
| 41 | 4  | 38 | ← | 40 | 3  | 37 | 1106.41196 | 0.00008  |
| 41 | 3  | 38 | ← | 40 | 4  | 37 | 1106.41196 | 0.00008  |
| 37 | 7  | 30 | ← | 36 | 8  | 29 | 1106.42173 | -0.00018 |
| 40 | 4  | 36 | ← | 39 | 5  | 35 | 1106.42882 | 0.00017  |
| 40 | 5  | 36 | ← | 39 | 4  | 35 | 1106.42882 | 0.00017  |
| 39 | 6  | 34 | ← | 38 | 5  | 33 | 1106.44356 | 0.00010  |
| 39 | 5  | 34 | ← | 38 | 6  | 33 | 1106.44356 | 0.00036  |
| 38 | 6  | 32 | ← | 37 | 7  | 31 | 1106.45547 | 0.00022  |
| 38 | 7  | 32 | ← | 37 | 6  | 31 | 1106.46215 | -0.00013 |
| 37 | 8  | 30 | ← | 36 | 7  | 29 | 1106.54478 | 0.00031  |
| 45 | 0  | 45 | ← | 44 | 1  | 44 | 1106.57186 | -0.00003 |
| 45 | 1  | 45 | ← | 44 | 0  | 44 | 1106.57186 | -0.00003 |
| 44 | 1  | 43 | ← | 43 | 2  | 42 | 1106.60069 | -0.00046 |
| 44 | 2  | 43 | ← | 43 | 1  | 42 | 1106.60069 | -0.00046 |
| 43 | 3  | 41 | ← | 42 | 2  | 40 | 1106.62607 | -0.00029 |
| 43 | 2  | 41 | ← | 42 | 3  | 40 | 1106.62607 | -0.00029 |
| 42 | 3  | 39 | ← | 41 | 4  | 38 | 1106.64767 | -0.00004 |
| 42 | 4  | 39 | ← | 41 | 3  | 38 | 1106.64767 | -0.00004 |
| 41 | 5  | 37 | ← | 40 | 4  | 36 | 1106.66577 | 0.00009  |
| 41 | 4  | 37 | ← | 40 | 5  | 36 | 1106.66577 | 0.00010  |
| 40 | 6  | 35 | ← | 39 | 5  | 34 | 1106.68139 | 0.00002  |
| 40 | 5  | 35 | ← | 39 | 6  | 34 | 1106.68139 | 0.00016  |
| 39 | 6  | 33 | ← | 38 | 7  | 32 | 1106.69517 | 0.00013  |

---

---

|    |    |    |   |    |    |    |            |          |
|----|----|----|---|----|----|----|------------|----------|
| 39 | 7  | 33 | ← | 38 | 6  | 32 | 1106.69892 | -0.00002 |
| 46 | 1  | 46 | ← | 45 | 0  | 45 | 1106.80323 | 0.00002  |
| 46 | 0  | 46 | ← | 45 | 1  | 45 | 1106.80323 | 0.00002  |
| 43 | 4  | 40 | ← | 42 | 3  | 39 | 1106.88266 | -0.00028 |
| 43 | 3  | 40 | ← | 42 | 4  | 39 | 1106.88266 | -0.00028 |
| 42 | 4  | 38 | ← | 41 | 5  | 37 | 1106.90209 | -0.00003 |
| 42 | 5  | 38 | ← | 41 | 4  | 37 | 1106.90209 | -0.00003 |
| 41 | 6  | 36 | ← | 40 | 5  | 35 | 1106.91870 | -0.00008 |
| 41 | 5  | 36 | ← | 40 | 6  | 35 | 1106.91870 | -0.00001 |
| 40 | 6  | 34 | ← | 39 | 7  | 33 | 1106.93374 | -0.00005 |
| 39 | 8  | 32 | ← | 38 | 7  | 31 | 1106.97751 | 0.00025  |
| 47 | 0  | 47 | ← | 46 | 1  | 46 | 1107.03409 | 0.00016  |
| 47 | 1  | 47 | ← | 46 | 0  | 46 | 1107.03409 | 0.00016  |
| 35 | 9  | 27 | ← | 34 | 8  | 26 | 1107.15162 | -0.00019 |
| 42 | 6  | 37 | ← | 41 | 5  | 36 | 1107.15571 | 0.00005  |
| 42 | 5  | 37 | ← | 41 | 6  | 36 | 1107.15571 | 0.00009  |
| 37 | 9  | 29 | ← | 36 | 8  | 28 | 1107.17656 | 0.00006  |
| 40 | 7  | 33 | ← | 39 | 8  | 32 | 1107.18008 | 0.00013  |
| 40 | 8  | 33 | ← | 39 | 7  | 32 | 1107.20526 | 0.00042  |
| 25 | 9  | 17 | ← | 24 | 8  | 16 | 1107.23846 | -0.00043 |
| 48 | 1  | 48 | ← | 47 | 0  | 47 | 1107.26412 | 0.00006  |
| 48 | 0  | 48 | ← | 47 | 1  | 47 | 1107.26412 | 0.00006  |
| 38 | 9  | 30 | ← | 37 | 8  | 29 | 1107.26684 | -0.00023 |
| 39 | 9  | 31 | ← | 38 | 8  | 30 | 1107.40099 | -0.00020 |
| 42 | 6  | 36 | ← | 41 | 7  | 35 | 1107.40927 | 0.00023  |
| 41 | 7  | 34 | ← | 40 | 8  | 33 | 1107.42223 | 0.00039  |
| 41 | 8  | 34 | ← | 40 | 7  | 33 | 1107.43636 | 0.00028  |
| 49 | 1  | 49 | ← | 48 | 0  | 48 | 1107.49381 | 0.00023  |
| 49 | 0  | 49 | ← | 48 | 1  | 48 | 1107.49381 | 0.00023  |
| 31 | 9  | 23 | ← | 30 | 8  | 22 | 1107.52448 | -0.00087 |
| 40 | 9  | 32 | ← | 39 | 8  | 31 | 1107.56855 | -0.00021 |
| 41 | 8  | 33 | ← | 40 | 9  | 32 | 1107.62937 | 0.00023  |
| 43 | 6  | 37 | ← | 42 | 7  | 36 | 1107.64580 | 0.00006  |
| 42 | 7  | 35 | ← | 41 | 8  | 34 | 1107.66163 | 0.00029  |
| 42 | 8  | 35 | ← | 41 | 7  | 34 | 1107.66917 | -0.00024 |
| 22 | 22 | 1  | ← | 22 | 21 | 2  | 1107.68745 | -0.00034 |
| 20 | 12 | 9  | ← | 19 | 11 | 8  | 1107.75938 | 0.00028  |
| 44 | 7  | 38 | ← | 43 | 6  | 37 | 1107.88170 | -0.00036 |
| 44 | 6  | 38 | ← | 43 | 7  | 37 | 1107.88170 | -0.00018 |
| 42 | 8  | 34 | ← | 41 | 9  | 33 | 1107.88935 | 0.00026  |
| 43 | 7  | 36 | ← | 42 | 8  | 35 | 1107.89902 | -0.00025 |
| 43 | 8  | 36 | ← | 42 | 7  | 35 | 1107.90360 | -0.00019 |
| 42 | 9  | 34 | ← | 41 | 8  | 33 | 1107.96800 | 0.00009  |

---

---

|    |    |    |   |    |    |    |            |          |
|----|----|----|---|----|----|----|------------|----------|
| 43 | 9  | 35 | ← | 42 | 8  | 34 | 1108.18621 | 0.00015  |
| 18 | 14 | 5  | ← | 17 | 13 | 4  | 1108.35506 | 0.00013  |
| 38 | 10 | 29 | ← | 37 | 9  | 28 | 1108.49080 | -0.00063 |
| 45 | 9  | 37 | ← | 44 | 8  | 36 | 1108.63937 | -0.00005 |
| 46 | 8  | 38 | ← | 45 | 9  | 37 | 1108.86131 | -0.00002 |
| 35 | 10 | 26 | ← | 34 | 9  | 25 | 1108.90467 | -0.00046 |
| 22 | 13 | 10 | ← | 21 | 12 | 9  | 1108.92326 | -0.00010 |
| 33 | 10 | 24 | ← | 32 | 9  | 23 | 1109.10955 | -0.00028 |
| 23 | 13 | 11 | ← | 22 | 12 | 10 | 1109.20950 | -0.00001 |
| 20 | 15 | 6  | ← | 19 | 14 | 5  | 1109.53324 | 0.00010  |
| 24 | 14 | 11 | ← | 23 | 13 | 10 | 1110.08964 | 0.00008  |
| 28 | 13 | 16 | ← | 27 | 12 | 15 | 1110.61244 | 0.00006  |
| 26 | 15 | 12 | ← | 25 | 14 | 11 | 1111.25802 | 0.00032  |
| 31 | 14 | 18 | ← | 30 | 13 | 17 | 1112.04252 | 0.00008  |
| 30 | 15 | 16 | ← | 29 | 14 | 15 | 1112.37907 | -0.00017 |
| 33 | 15 | 19 | ← | 32 | 14 | 18 | 1113.20080 | 0.00032  |
| 35 | 15 | 21 | ← | 34 | 14 | 20 | 1113.73646 | 0.00037  |
| 24 | 21 | 4  | ← | 23 | 20 | 3  | 1114.36563 | -0.00017 |
| 22 | 22 | 1  | ← | 21 | 21 | 0  | 1114.41784 | -0.00033 |
| 33 | 17 | 17 | ← | 32 | 16 | 16 | 1114.43374 | 0.00007  |
| 32 | 18 | 15 | ← | 31 | 17 | 14 | 1114.77355 | 0.00012  |

---
